# Supplementary material for: Morphologic and Genetic Characterization of Ilheus Virus, a Potential Emergent Flavivirus in the Americas
Source: MDPI journal article supplement (doi:10.3390/v15010195), 2023-01-10
Supplement: s1 [file s1]

# Capsid

|           |                                                                                                                                                                                                         |
|-----------|---------------------------------------------------------------------------------------------------------------------------------------------------------------------------------------------------------|
| Ruler 1   | 1 10 20 30 40 50 60 70 80 90                                                                                                                                                                            |
| Consensus | M s n - x x K k g g r r x v N M L K R g r n R V S x l x G L - K R f s x g L L x G x G P x R I V L A f I A F x R F I A I - - - p P T a G I L k R W g s v k K s x A i K x L t g F K K E i g x M L n l i N |
| ILHV      | M S K K P G K S A A K R T V N M L K R L - A S V S P L K G A - K K L F G E L L S G K G A I R L I L A L M A F F R F A A I - - - K P T L G L K K R W R S V N K T V A V K H L T N F K K E L T T M L D S V N |
| ROCV      | M S K K P G G P A G R R V V N M L K R P - A S V S P I K G I - K R L I G N L T D G R G P L R V V L A F I A F F R F A A I - - - M P T Q G L L R R W R V M N K S E A L K H L T S F K K E I S N M L N I I N |
| WNV       | M S K K P G G P G K S R A V N M L K R G M P R V L S L I G L - K R A M L S L I D G K G P I R F V L A L L A F F R F T A I - - - A P T R A V L D R W R G V N K Q T A M K H L L S F K K E L G T L T S A I N |
| JEV       | M T K K P G G P G K N R A I N M L K R G L P R V F P L V G V - K R V V M S L L D G R G P V R F V L A L I T F F K F T A L - - - A P T K A L L G R W K A V E K S V A M K H L T S F K R E L G T L I D A V N |
| DENV1     | M N N - Q R K K T G R P S F N M L K R A R N R V S T V S Q L A K R F S K G L L S G Q G P M K L V M A F I A F L R F L A I - - - P P T A G I L A R W G S F K K N G A I K V L R G F K K E I S N M L N I M N |
| DENV2     | M N N - Q R K K A R N T P F N M L K R E R N R V S T V Q Q L T K R F S L G M L Q G R G P L K L F M A L V A F L R F L T I - - - P P T A G I L K R W G T I K K S K A I N V L R G F R K E I G R M L N I L N |
| DENV3     | M N N - Q R K K T G K P S I N M L K R V R N R V S T G S Q L A K R F S R G L L N G Q G P M K L V M A F I A F L R F L A I - - - P P T A G V L A R W G T F K K S G A I K V L K G F K K E I S N M L S I I N |
| DENV4     | - M N - Q R K K V V R P P F N M L K R E R N R V S T P Q G L V K R F S T G L F S G K G P L R M V L A F I T F L R V L S I - - - P P T A G I L K R W G L K K N K A I K I L T G F R K E I G R M L N I L N   |
| ZIKV      | M K N P K K K S G G F R I V N M L K R G V A R V N P L G G L - K R L P A G L L L G H G P I R M V L A I L A F L R F T A I - - - K P S L G L I N R W G S V G K K E A M E I I K K F K K D L A A M L R I I N |
| YFV       | M S G - R K A Q G K T L G V N M V R R G V R S L S N K I - - - K Q K T K Q I G N R P G P S R G V Q G F I F F F L F N I L T G K K I T A H L K R L W K M L D P R Q G L A V L R K V K R V V A S L M R G L S |

|           |                                                               |
|-----------|---------------------------------------------------------------|
| Ruler 1   | 110 120 130                                                   |
| Consensus | r R K r k x - - - - - l x x i x L l p t v m A - - -           |
| ILHV      | K R K E K K - - - K S F S T A L L W I T M I T A V A G - - -   |
| ROCV      | R R K A K R - - - - G N G S V L L W I A L V T G S M A - - -   |
| WNV       | R R S S K Q K K R G G K T G I A V M I G L I A S V G - - - A   |
| JEV       | K R G R K Q N K R G G N E G S I M W L A S L A V I I A C A G A |
| DENV1     | R R K R S V - - - - - T M L M L L P T A L A - - -             |
| DENV2     | R R R R T A - - - - - G M I I M L I P T V M A - - -           |
| DENV3     | K R K K T S - - - - - L C L M M M L P A T L A - - -           |
| DENV4     | G R K R S T - - - - - M T L L C L I P T V M A - - -           |
| ZIKV      | A R K E R K R R - - G A D T S I G I I G L L L T T A M A - - - |
| YFV       | S R K R R S H D V - - L T V Q F L I L G M L L M T G G - - -   |

**Supplementary Figure S2: Alignment of Individual Proteins Across Multiple Flaviviruses.** Individual proteins from representative flaviviruses were aligned using the Clustal Omega algorithm in MegAlign Pro v17.2.1 (DNASTAR, Madison, WI). Amino acids are colored by side chain chemistry: aromatic residues (F, W, and Y) are yellow, acidic residues (D and E) are red, basic residues (R, H, and K) are blue, nonpolar residues (A, G, I, L, M, P, and V) are orange, and polar residues (C, N, Q, S, and T) are green). Gaps are represented as dashes. Black rectangles designate cysteine residues predicted to form disulfide bridges.

# prM

|           |                                                                                                                                                                                                         |
|-----------|---------------------------------------------------------------------------------------------------------------------------------------------------------------------------------------------------------|
| Ruler 1   | 1 10 20 30 40 50 60 70 80 90                                                                                                                                                                            |
| Consensus | f h L x t r q G e p l M i V n k t D x G k s i l f x T x k G v N m C t x r A M D I G y M C e D T i T Y E C p x L t e g n E P E D I D C W C n l - t s x w V t Y G t C t q t g - e x R R s R R S V a L p p |
| ILHV      | L K I S S H R D R P L L M V N K T D V S D A I P V P S V K G T N M C T I R A L D V G Y T C A Y D T T Y E C P H L E V T M D P E D I D C W C T L - E S V Y V N Y G L C K Q N H - H V R R G R R A I N I P H |
| ROCV      | L R L G T Y Q G K V L M S I N K T D V A E I I P I P T T K G D N L C T V R A M D V G Y M C Q K D I T Y E C P R L E P G M D P E D I D C W C D R - E A I Y V H Y G L C T K N H - R E R R G R R S V N I P S |
| WNV       | V T L S N F Q G K V M M T V N A T D V T D V I T I P T A A G K N L C I V R A M D V G Y M C D D T I T Y E C P V L S A G N D P E D I D C W C T K - S A V Y V R Y G R C T K T R - H S R R S R R S L T V Q T |
| JEV       | M K L S N F Q G K L L M T V N N T D I A D V I V I P T S K G E N R C W V R A I D V G Y M C E D T I T Y E C P K L T M G N D P E D V D C W C D N - Q E V Y V Q Y G R C T R T R - H S K R S R R S V S V Q T |
| DENV1     | F H L T T R G G E P H M I V S K Q E R G K S L L F K T S A G V N M C T L I A M D L G E L C E D T M T Y K C P R I T E - T E P D D V D C W C N A - T E T W V T Y G T C S Q T G - E H R R D K R S V A L A P |
| DENV2     | F H L T T R N G E P H M I V S R Q E K G K S L L F K T X D G V N M C T L M A M D L G E L C E D T I T Y K C P X L R Q - N E P E D I D C W C N S - T S T W V T Y G T C T T T G - E H R R E K R S V A L V P |
| DENV3     | F H L T S R D G E P R M I V G K N E R G K S L L F K T A S G I N M C T L I A M D L G E M C D D T V T Y K C P H I T E - V E P E D I D C W C N L - T S T W V T Y G T C N Q A G - E H R R D K R S V A L A P |
| DENV4     | F H L S T R D G E P L M I V A K H E R G R P L L F K T T E G I N K C T L I A M D L G E M C E D T V T Y E C P L L V N - T E P E D I D C W C N L - T S A W V M Y G T C T Q S G - E R R R E K R S V A L T P |
| ZIKV      | A E I T R R G S A Y Y M Y L D R S D A G K A I S F A T T L G V N K C H V Q I M D L G H M C A T M S Y E C P M L D E G V E P D D V D C W C N T - T S T W V V Y G T C H H K K G E A R R S R R A V T L P S   |
| YFV       | V T L V R K N R W L L L N V T S E D L G K T F - - - S V G T G N C T T N I L E A K Y W C P D S M E Y N C P N L S P R E E P D D I D C W C Y G V E N V R V A Y G K C D S A G - R S R R S R R A I D L P T   |

  

|           |                                                                                                                                           |
|-----------|-------------------------------------------------------------------------------------------------------------------------------------------|
| Ruler 1   | 110 120 130 140 150 160                                                                                                                   |
| Consensus | H g x s g L e T R t e t W M x S e x A t K y L q K V E n W i I R N P G F A l v A l x I A w m I G S n t t Q R V V f f I L L I L V A P A Y S |
| ILHV      | H G E S H L E N R A T P W M D T T K T T K Y L T K V E N W V I R N P G Y A L V A L A T A W M L G S N T P Q R V V F M I M M M L I A P A Y S |
| ROCV      | H G E S Q L E N R G T P W L D T A K T T K Y L T K V E N W M I R N P G Y A I V A V A A A W M L G S N T S Q K V I F T I M L L L I A P A Y S |
| WNV       | H G E S T L A N K K G A W M D S T K A T R Y L V K T E S W I L R N P G Y A L V A A V I G W M L G S N T M Q R V V F V V L L L L V A P A Y S |
| JEV       | H G E S S L V N K K E A W L D S T K A T R Y L M K T E N W I V R N P G Y A F L A A I L G W M L G S N N G Q R V V F T I L L L L V A P A Y S |
| DENV1     | H V G L G L E T R T E T W M S S E G A W K Q I Q K V E T W A L R H P G F T V I A L F L A H A I G T S I T Q K G I I F I L L M L V T P S M A |
| DENV2     | H V G M G L E T R T E T W M S S E G A W K H A Q R I E T W I L R H P G F T I M A A I L A Y T I G T T H F Q R A L I F I L L T A V A P S M T |
| DENV3     | H V G M G L D T R T Q T W M S A E G A W R Q V E K V E T W A L R H P G F T I L A L F L A H Y I G T S L T Q K V V I F I L L M L V T P S M T |
| DENV4     | H S G M G L E T R A E T W M S S E G A W K H A Q R V E S W I L R N P G F A L L A G F M A Y M I G Q T G I Q R T V F F V L M M L V A P S Y G |
| ZIKV      | H S T R K L Q T R S Q T W L E S R E Y T K H L I K V E N W I F R N P G F A L V A V A I A W L L G S S T S Q K V I Y L V M I L L I A P A Y S |
| YFV       | H E N H G L K T R Q E K W M T G R M G E R Q L Q K I E R W L V R N P F F A V T A L T I A Y L V G S N M T Q R V V I A L L V L A V G P A Y S |

**Supplementary Figure S2: Alignment of Individual Proteins Across Multiple Flaviviruses.** Individual proteins from representative flaviviruses were aligned using the Clustal Omega algorithm in MegAlign Pro v17.2.1 (DNASTAR, Madison, WI). Amino acids are colored by side chain chemistry: aromatic residues (F, W, and Y) are yellow, acidic residues (D and E) are red, basic residues (R, H, and K) are blue, nonpolar residues (A, G, I, L, M, P, and V) are orange, and polar residues (C, N, Q, S, and T) are green). Gaps are represented as dashes. Black rectangles designate cysteine residues predicted to form disulfide bridges.

# Envelope

|           |                                                                                                                                                                                                         |
|-----------|---------------------------------------------------------------------------------------------------------------------------------------------------------------------------------------------------------|
| Ruler 1   | 1 10 20 30 40 50 60 70 80 90                                                                                                                                                                            |
| Consensus | m r I G x x N R D F V E G V S G G T W V D x V L E H G s C V T T M A K D K P T L D I E L I k t E A k x I A x v R s C Y e A x x T x i x T d x R C P T Q G E A H L x x e q D x s Y V C K R t y V D R G     |
| ILHV      | L N C L G I S N R D F V E G L S G G T W V D I V L E G G S C V T V M A K D K P T L D I K L I R M E A K D L A T V R S Y C Y A T V T D S S T E A R C P T M G E A H N S K S L D A S Y V C K S S Y V D R G   |
| ROCV      | I N C L G V T N R D F V E G M S G G T W V D I V L E G D G C V T I M A K D K P T L D I R L L K M E A K D L A T V R S Y C Y H A T V T S V S S E A R C P T M G E A H N P K A L D S S Y L C K S T Y V D R G |
| WNV       | F N C L G M S N R D F L E G V S G A T W V D L V L E G D S C V T I M S K D K P T I D V K M M N M E A A N L A E V R S Y C Y L A T V S D L S T K A A C P T M G E A H N D K R A D P A F V C R Q G V V D R G |
| JEV       | F N C L G M G N R D F I E G A S G A T W V D L V L E G D S C L T I M A N D K P T L D V R M I N I E A V Q L A E V R S Y C Y H A S V T D I S T V A R C P T T G E A H N K K R A D S S Y V C K Q G F T D R G |
| DENV1     | M R C V G I G N R D F V E G L S G A T W V D V V L E H G S C V T T M A K D K P T L D I E L L K T E V T N P A V L R K L C I E A K I S N T T T D S R C P T Q G E A T L V E E Q D T N F V C R R T F V D R G |
| DENV2     | M R C I G I S N R D F V E G V S G S W V D I V L E H G S C V T T M A K N K P T L D F E L I K T E A K Q P A T L R K Y C I E A K L T N T T T D S R C P T Q G E P S L N E E Q D K R F V C K H S M V D R G   |
| DENV3     | M R C V G V G N R D F V E G L S G A T W V D V V L E H G G C V T T M A K N K P T L D I E L Q K T E A T Q L A T L R K L C I E G K I T N I T T D S R C P T Q G E A I L P E E Q D Q N Y V C K H T Y V D R G |
| DENV4     | M R C V G V G N R D F V E G V S G G A W V D L V L E H G G C V T T M A Q G K P T L D F E L I K T T A K E V A L L R T Y C I E A S I S N I T T A T R C P T Q G E P Y L K E E Q D Q Q Y I C R R D V V D R G |
| ZIKV      | I R C I G V S N R D F V E G M S G G T W V D V V L E H G G C V T V M A Q D K P T V D I E L V T T V S N M A E V R S Y C Y E A S I S D M A S D S R C P T Q G E A Y L D K Q S D T Q Y V C K R T L V D R G   |
| YFV       | A H C I G I T D R D F I E G V H G G T W V S A T L E Q D K C V T V M A P D K P S L D I S L E T V A I D G P A E A R K V C Y N A V L T H V K I N D K C P S T G E A H L A E E N E G D N A C K R T Y S D R G |

|           |                                                                                                                                                                                                         |
|-----------|---------------------------------------------------------------------------------------------------------------------------------------------------------------------------------------------------------|
| Ruler 1   | 110 120 130 140 150 160 170 180 190                                                                                                                                                                     |
| Consensus | W G N G C G L F G K G S i v T C A K F x C s k K a t G k t x Q p E N L k Y x V a i t V H g g x t h - - h g n y v g x e t a k h x a f x I T P q x P s x E A k L g e Y G e I T L D C E P R t G L D F n e   |
| ILHV      | W G N G C G L F G K G S I Q T C Y K F S C P G K A T G K S I Q R E N L N Y D A V Y V H G P I S A A A H G N Y T A Q L T G K Y A A K F S I T P S A P T Y T A N L G E Y G E A T M C E P R A A L D I D N     |
| ROCV      | W G N G C G L F G K G S L Q T C V K F G C T Q K A M G M T I Q R E N L D Y E L A I Y V H G P T S V A A H G N Y T T Q L G A K H A A K F S I T P S S P S T A N L G E Y G E A T V D C E P R A A L D I D N   |
| WNV       | W G N G C G L F G K G S I D T C A K F A C S T K A I G R T I L K E N I K Y E A I F V H G P T T V E S H G N Y S T Q V G A T Q A G R F S I T P A A P S Y T L K L G E Y G E V T V D C E P R S G I D T N A   |
| JEV       | W G N G C G L F G K G S I D T C A K F S C T S K A I G R T I Q P E N I K Y E V G I F V H G T T T S E N H G N Y S A Q V G A S Q A A K F T V T P N A P S T T L K L G D Y G E V T L D C E P R S G L N T E A |
| DENV1     | W G N G C G L F G K G S L I T C A K F K C V T K L E G K I V Y E N L K Y S I V T V H T G D Q H - - - - Q V G N E T T E H G T T A T I T P Q A P T S E I Q L T D Y G A L T L D C E P R T G L D F N E       |
| DENV2     | W G N G C G L F G K G G I V T C A M F T C K K N M K G K V V Q P E N L E Y T I V I T P H S G E E H - - - - A V G N D T G K H G K E I K I T P Q S S I T E A E L T G Y G T V T M C E P R T G L D F N E     |
| DENV3     | W G N G C G L F G K G S L V T C A K F C L E S I E G K V V Q H E N L K Y T V I T V H T G D Q H - - - - Q V G N E T Q - - G V T A E I T S Q A S T A E A I L P E Y G T L G L E C E P R T G L D F N E       |
| DENV4     | W G N G C G L F G K G G V V T C A F S C S G K I T G N L V Q I E N L E Y T V V T V H N G D T H - - - - A V G N I S N H G V A T I T P R S P S V E V K L P D Y E E L T D C E P R S G M D F N E             |
| ZIKV      | W G N G C G L F G K G S L V T C A K F T C S K M T G K S I Q P E N L E Y R I M L S V H G S Q H S G M I V N D T G Y E T D E N R A K V E V T P N S P R A E A T L G G F G S L G L D C E P R T G L D F S D   |
| YFV       | W G N G C G L F G K G S I V A C A K F T C A K S M S L F E V D Q T K I Q Y V I R A Q L H V G A K Q E N W N T - - - - - D I K T L K F D A L S G S Q E A E F T G Y G K A T L E C Q V Q T A V D F G N       |

|           |                                                                                                                                                                                                         |
|-----------|---------------------------------------------------------------------------------------------------------------------------------------------------------------------------------------------------------|
| Ruler 1   | 210 220 230 240 250 260 270 280 290                                                                                                                                                                     |
| Consensus | m Y x m t M x n K x W L V H R Q W F h D L p L P W T s G A x t - - x v W n n x E I L V E F x e x H A k k Q t V v x L G S Q E G A I H T A L x G A x e V e x S g x - - - x k l f s G H L K C R L K M D K   |
| ILHV      | Y Y V M S L N N K H W L V N R D W F H D L D L P W T G P A T - - - E S W K N R E S L I E F E E P H A T R Q T V V A L G N Q E G A L H T A L A G A I P V E V S S T T - - - L T L N S G H L K C R L K L D K |
| ROCV      | Y Y V M S M N N K H W L V N R D W F H D L D L P W T G P A T - - - D V W K N R E S L V F E E A H A T R Q T V V A L A A Q E G A L H T A L A G A I P V T V A G T T - - - L T L T S G H L K C R M K L D K   |
| WNV       | Y Y V M T V G T K T F L V H R E W F M D L N L P W S S A G S - - - T V W R N R E T L M F E E P H A T K Q S V I A L G S Q E G A L H Q A L A G A I P V E F S S N T - - - V K L T S G H L K C R V K M E K   |
| JEV       | F Y V M T V G S X S F L V H R E W F H D L A L P W T P P S - - - T A W R N R E L L M F E E A H A T K Q S V V A L G S Q E G G L H Q A L A G A I V V E Y S - N S - - - V K L T S G H L K C R L R M D K     |
| DENV1     | M V L L T M E K K S W L V H K Q W F L D L P L P W T S G A S T S Q E T W N R Q D L L V T F K T A H A K K Q E V V V L G S Q E G A M H T A L T G A T E I Q T S G T - - - T T I F A G H L K C R L K M D K   |
| DENV2     | M V L L Q M E N K A W L V H R Q W F L D L P L P W L P G A D T Q G S N W I Q E T L V T F K N P H A K K Q D V V V L G S Q E G A M H T A L T G A T E I Q M S S G - - - N L L F T G H L K C R L R M D K     |
| DENV3     | M I L L T M K N K A W M V H R Q W F F D L P L P W T S G A T T E T P T W N R K E L L V T F K N A H A K K Q E V V V L G S Q E G A M H T A L T G A T E I Q T S G G - - - T S I F A G H L K C R L K M D K   |
| DENV4     | M I L M K M K K K T W L V H K Q W F L D L P L P W A A G A D T S E V H W N Y K E R M V T F K V P H A K K R Q D V T V L G S Q E G A M H S A L T G A T E V D S G D G - - - N H M F A G H L K C K V R M E K |
| ZIKV      | L Y Y L T M N N K H W L V H K E W F H D I P L P W H A G A D T G T P H W N N K E A L V E F K D A H A K R Q T V V V L G S Q E G A V H T A L A G A L E A E M D G A K - - - G K L F S G H L K C R L K M D K |
| YFV       | S Y I A E M E K E S W I V D R Q W A Q D L T P W Q S G S G - - - G V W R E M H H L V E F E P P H A A T I R V L A L G N Q E G S L K T A L T G A M R V T K D T N D N N L Y K L H G G H V S R V K L S A     |

|           |                                                                                                                                                                                                         |
|-----------|---------------------------------------------------------------------------------------------------------------------------------------------------------------------------------------------------------|
| Ruler 1   | 310 320 330 340 350 360 370 380 390                                                                                                                                                                     |
| Consensus | L x L K G x S Y x M C t g k F x F a K e P A x T g H G T v V x e V q Y e G t D g p K I P i s x - a D L n d I T p v G R L x T V N P x V t x s e - - s k V I I E I E P P F G D S Y I V V G v G d k q I k   |
| ILHV      | L K I K G T T Y A M C K G T F A F A Q T P V D T G H G T I V A E L T Y T G T D G P C K I P I S M T A D L R D M T P I G R L V T V N P I I P S S A K S Q K I L V E L E P P F G S S F I L V G Q E N N Q I K |
| ROCV      | L K I K G S T Y L M C K D K F A F A K N P V D T G H G T I V E V Q Y A G S D G P C R I P I T M T E N L H D L T P I G R L V T V N P F V P S S E T A Q K I L I E L E P P F G T S F I L V G T G P N Q V K   |
| WNV       | L Q L K G T T Y G V C S K A F K F L G T P A D T G H G T V V L E L Q Y T G T D G P C K V P I S S V A S L N D T P V G R L V T V N P F V S V A T A N A K V L I E L E P P F G D S Y I V V G R E Q Q I N     |
| JEV       | L A L K G T T Y G M C T E K F S F A K N P A D T G H G T V V I E L S Y S G S D G P C K I P I V S V A S L N D M T P V G R L V T V N P F V A T S S A N S K V L V E M E P P F G D S Y I V V G R G D K Q I N |
| DENV1     | L T L K G M S Y V M C T G S F K L E K E V A E T Q H G T V L V Q V K Y E G T A P C K I P F S S - Q D E K G V T Q N G R L I T A N P I V T D K E - - K P V N I E A E P P F G S Y I V V G A G E K A L K     |
| DENV2     | L Q L K G M S Y M C T G K F K V V K E I A E T Q H G T I V I R V Q Y E G D G S P C K I P F E I - M D L E K R H V L G R L I T V N P I V T E K D - - S P V N I E A E P P F G S Y I I G V E P G Q L K       |
| DENV3     | L E L K G M S Y A M C L N T F V L K K E V S E T Q H G T I L I K V E Y K G E D A P C K I P F S T - E D G Q G K A H N G R L I T A N P V V T K K E - - E P V N I E A E P P F G S N I V I G I G D K A L K   |
| DENV4     | L R I K G M S Y T M C S G K F S I D K E M A E T Q H G T T V V K V Y E G A G A P C K V P I E I - R D V N K E K V V G R I I S S T P F A E Y T N - - S V T N I E L E P P F G D S Y I V I V G D S A L T     |
| ZIKV      | L R I K G V S Y S L C T A A F T F T K V P A E T L H G T V T V E V Q Y A G T D G P C K I P V Q M A V D M Q T L T P V G R L I T A N P V I T E S T E N S K M M L E D P P F G D S Y I V I V G D K K I T     |
| YFV       | L T L K G T S Y K M C T D K M S F V K N P T D T G H G T V V M Q V K V P - K G A P C K I P V I V A D D L T A A I N K G I L V T V N P I A S T N D - - D E V L I E V N P P F G D S Y I I V G T G D S R L T |

|           |                                                                                                                                                                                                         |
|-----------|---------------------------------------------------------------------------------------------------------------------------------------------------------------------------------------------------------|
| Ruler 1   | 410 420 430 440 450 460 470 480 490                                                                                                                                                                     |
| Consensus | x h W H K k G S S I G K a F e t T x x G A q R M A x L G D T A W D F G S V G G V F x S i G K a i H Q V F G x A F r x L F G G m S w i t q i L i G a L L I W I G x N s R n x S x S i t c I A V G G x x L F |
| ILHV      | Y Q W H K T G S T I G N A L K T T W K G A Q R F A V L G D T A W D F G S V G G I F N S I G K T I H G V F G T A F R S L F G G M S W V T Q A L M G A L L L W L G I S A R E R T V S L I M L S V G G I L L F |
| ROCV      | Y Q W H K S G S V I G S A F K T T I K G A Q R M A V L G E T A W D F G S V G G V F N S I G K I H G L F G G A F R T L F G G M S W V T Q A L M G A L L L W L G V S S R E R T V S I T L L A T G G I L L F   |
| WNV       | H H W H K S G S S I G K A F T T T L K G A Q R L A A L G D T A W D F G S V G G V F T S V G K A V H Q V F G G A F R S L F G G M S W I T Q G L L G A L L L W M G I N A R D R S I A L T F L A V G G V L L F |
| JEV       | H H W H K A G S T L G K A F S T T L K G A Q R L A A L G D T A W D F G S I G G V F N S I G K A V H Q V F G G A F R T L F G G M S W I T Q G L M G A L L L W M G V N A R D R S I A L A F L A T G G V L V F |
| DENV1     | L S W F K G G S S I G K M F E A T A R G A R R M A I L G D T A W D F G S I G G V F N S I G K I H Q I F G T A Y G V L F S G V S W T M K I G I G L L T W L G L N S R S T L S M T C I A V G M T L Y         |
| DENV2     | L N W F K K G S S I G Q M X E T T M R G A K R M A I L G D T A W D F G S L G G V F T S I G K A L H Q V F G A I Y G A A F S G V S W T M K I L I G V I I T W I G M N S R S T L S V S L V L V G V V T L Y   |
| DENV3     | I N W Y R K G S S I G K M F E A T A R G A R R M A I L G D T A W D F G S V G G V L N S L G K M V H Q I F G S A Y T A L F S G V S W I M K I G I G V L L T W I G L N S K N T S M S F S C I A I G I T L Y   |
| DENV4     | L H W F R K G S S I G K M L E S T Y R G A K R M A I L G E T A W D F G S V G G L T S L G K A V H Q V F G S V Y T T M F G G S W M V R L I G F L V L W I G T N S R N T S M A M T C I A V G D I T L F       |
| ZIKV      | H H W H R S G S T I G K A F E A T V R G A K R M A V L G D T A W D F G S V G G V F N S L G K I H Q I F G A A F K S L F G G M S W F S Q I L I G T L L V L W L G L N T K N G S I S L T C L A L G G V M I F |
| YFV       | Y Q W H K E G S S I G K L F T Q T M K G A E R L A V M G D A A W D F S S A G G F F T S V G K I H T V F G S A F Q G L F G G L N W I T K V I M G A V L I W V G I N T R N M T M S M S M I L V G V I M M F   |

|           |               |
|-----------|---------------|
| Ruler 1   |               |
| Consensus | L g v n V h A |
| ILHV      | L A V N V H A |
| ROCV      | L A M N V H A |
| WNV       | L S V N V H A |
| JEV       | L A T N V H A |
| DENV1     | L G V M V Q A |
| DENV2     | L G V M V Q A |
| DENV3     | L G V V V Q A |
| DENV4     | L G F T V H A |
| ZIKV      | L S T A V S A |
| YFV       | L S L G V G A |

**Supplementary Figure S2: Alignment of Individual Proteins Across Multiple Flaviviruses.** Individual proteins from representative flaviviruses were aligned using the Clustal Omega algorithm in MegAlign Pro v17.2.1 (DNASTAR, Madison, WI). Amino acids are colored by side chain chemistry: aromatic residues (F, W, and Y) are yellow, acidic residues (D and E) are red, basic residues (R, H, and K) are blue, nonpolar residues (A, G, I, L, M, P, and V) are orange, and polar residues (C, N, Q, S, and T) are green. Gaps are represented as dashes. Black rectangles designate cysteine residues predicted to form disulfide bridges.

# NS1

|           |                                                                                                         |
|-----------|---------------------------------------------------------------------------------------------------------|
| Ruler 1   | 1 10 20 30 40 50 60 70 80 90                                                                            |
| Consensus | DtGCAIdwxrkELKCGSGGIFiHNDVeTWxqYKYqPesPxRLAKaIqkAheEGVGIRSVtRLExxMWKqlaxELNaIlEeNgVDLxVVVgdykGiyrG      |
| ILHV      | DTGCAIDMARRELKCGSGGIFIHNDVETWRNNYKYHPLTPRGFAKVIQMSKDKGVCIRSVGRLEHEMWEAIAPELNAIFEDNGVDLSVVVGQGTGIYKRA    |
| ROCV      | DTGCAIDITRRELKCGSGGIFIHNDVETWRDNYKYHPTPKNFAKIHKAYKEGICGVRASARLEHEMWWKIAPELNAILEDNEVDLSVVVEEHKGIYKKA     |
| WNV       | DTGCAIDISRQELRCGSGGVFIHNDVEAWMDRYKYYPETPQGLAKIIQKAHKEGVCGLRSVSRLHEQMWEAVKDELNTLLKENGVDLSVVVEKQEGMYKSA   |
| JEV       | DTGCAIDVTRKEMRCGSGGIFVHNDVEAWVDYKYLPETPRSLAKIVHKAHKEGVCGRSVTRLEHQMWEAVRDELNVLLKENAVDLSVVVNKPVGYSRA      |
| DENV1     | DSTGGVINWKGRELKCGSGGIFVNEVHTWTEQYKFQADSPKRLSAAIGKAWEEGVCGRSATRLLENIMWKQISNELNHILLENDMKFTVVVGVDVSGILAQQ  |
| DENV2     | DSTGGVVSWKRELKCGSGGIFITDNVHTWTEQYKFQPEPSKLSAAIQKAHEEGICGRSVTRLENLMWKQITPELNHILLENEVKLTIIMTGDIKGIMQAG    |
| DENV3     | DMGCVINWKGKELKCGSGGIFVNEVHTWTEQYKFQADSPKRLATAIAGAWENGVCGRSTTRMENLLWKQIANELNYILWENNIIKLTVVVGDIITGVLEQG   |
| DENV4     | DTGCAVSWSGKELKCGSGGIFVNDNVHTWTEQYKFQPESPARLASAILNAHKDGVCGRISTTRLENIMWKQITNELNYVLWEGGHDLTVVAGDVKGVLSKG   |
| ZIKV      | DVGCSVDFSKKETRCGTGVFIYNDVEAWDRYKYHPDSPRRLAAAVKQAWEEGICGIISSVSRMENIMWKSVEGELNAILEENGVDLTVVVGVSVKNPWMRG   |
| YFV       | DQGCALINFGKRELKCGSGGIFIFRSDDDLNLKYSYYPEDPVKLASIVKASFEKGKGLNSVDSLEHEMWRSSRADEINAILLEENEVDISVVVQDPKNVYQRG |

  

|           |                                                                                                         |
|-----------|---------------------------------------------------------------------------------------------------------|
| Ruler 1   | 110 120 130 140 150 160 170 180 190                                                                     |
| Consensus | pKRLtptpdELkyGWkTWGKskifSpExaNsTFxxDGPtKEPTenRAWNSIEVEDfGFGxFtTniWLKvRExyTxxCDsXImGxAVKgnxAVHsDIGY      |
| ILHV      | PKRLTETKDEMSFGWKNWGSKFIFSTETANSTFIVDGPESKEPTSDRAWNSLELEDfGFGIISTKIFLKVNEQRGNSCDASAVIGTAVKGNIAVHSDLGy    |
| ROCV      | PLRLENTSDEMhFGWKNWGSFLFKPTQMANSTFVVDGPEETPTERRAWNSLEIEDfGFGIMSTKVFLKVNGDKTECDSMVMGTAIKGNRAVHSDLGy       |
| WNV       | PKRLTATTEKLEIGWKAWGKSILFAPELANNTFVVDGPETKEPTQNRRAWNSLEVEDfGFGLTSTRMFLKVRESNTTECDSKIIGTAVKNNLAIHSDLSy    |
| JEV       | PKRLSMTQEKFEWGKAWGKSILFAPELANSTFVVDGPETKECPDEHRAWNSMQIEDfGFGITSTRVWLKIREESTDECDGAIIGTAVKGHVAVHSDLSy     |
| DENV1     | KKMIRPQPMEHKYSWKSWSGKAKIIGADVQNTTFIIDGPNTPEDPNQRAWNSIWEVEDYGFGIFTTNIIWLKLRDSYTQVCDHRLMSAAIKDSKAVHADMGy  |
| DENV2     | KRSLXPQPTLKYSWKTWGAKEMLSTESHNTQFTLIDGPTAECPNTNRRAWNSLEVEDYGFGVFTTNIIWLKLRKQDVFCDSKLMSAAIKDNRRAVHADMGy   |
| DENV3     | KRTLTPQPMELKYSWKTWGAKEIVTAETQNSSFIIDGPTSTPECPASRAWNSVWEVEDYGFGVFTTNIIWLKLRVYTTQLCDHRLMSAAIKDERAVHADMGy  |
| DENV4     | KRALAPPVNDLKYSWKTWGAKEIIFTPKAKNSTFLIDGPDTPKECPNERRAWNSLEVEDYGFGMFTTNIIWMKFRGSSVECDHRLMSAAIKDQKAVHADMGy  |
| ZIKV      | PQRLPPVYNELPHGWKAWGKSYYFVRAAKTNSFVVDGDTLKECPLEHRAWNSFLVEDYHGFVFTSNVWLKVRREDYSLECDPAVIGTAVKGRRAHSDLGy    |
| YFV       | THPFSSRIIDGLQYGWKTWGNLVSFSPGRKNGSFIIDGKSRKECPFSNRVWNSFQIEEFGTGVFTTRVYMDAVFEYTTIDCDGSILGAAVNGKKSAAHGSPTF |

  

|           |                                                                                                        |
|-----------|--------------------------------------------------------------------------------------------------------|
| Ruler 1   | 210 220 230 240 250 260 270 280 290                                                                    |
| Consensus | WIESx-KNdTWkLERAxLiEVKsCTWPkSHTLWxxGVxESdxIIPktIAGPxSqHNyRPGYkTQTxGPWHxg-kLEIdfdeCPGTTvtieExGnRGPSI    |
| ILHV      | WIESK-KNESWQLERAVLGEVKSCTWPESHTLWGDGYEESDLIIPITLAGPKSHHNMRRPGYKTQTQKPWHEETPLVIEFAECPGTTVTQEESCGGRGPSI  |
| ROCV      | WIESG-KNTSWRLERAVLGEVKSCTWPESHTLWNEGVEDSDLIIPPTLGGPRTHHNKREGYKTQLKGPWNEEGPIIEFGCEPGTGTVTQEESCRRRAASA   |
| WNV       | WIESR-LNDTWKLERAVLGEVKSCTWPETHLWGDGILESDLIIPVTLAGPNSHHNRPGYKTQNGQPWDEG-RVEIDFDYCPGTTVTLSESCGHRGPAT     |
| JEV       | WIESR-YNDTWKLERAVLGEVKSCTWPETHLWGDGYEESDLIIPHTIAGPKSKHNRREGYKTQNGQPWDEN-GIVLDFDYCPGTTVTITEDCGKRGPSV    |
| DENV1     | WIESE-KNETWKLARASFIEVKTCIWPKSHTLWSNGVLESEMIIPKIYGGPISQHNRRPGYHTQTAGPWHLG-KLELDFDCEGTTVVVDEHCGNRGPSL    |
| DENV2     | WIESA-LNDTWKIEKASFIEVKSCHWPKSHTLWSNGVLESEMIIPKNFAGPVPSQHNRRPGYHTQTAGPWHLG-KLEMDFFCEGTTVVVTEDCGNRGPSL   |
| DENV3     | WIESQ-KNGSWKLEKASLIEVKTCTWPKSHTLWSNGVLESDMIIPKSLAGPISQHNRRPGYHTQTAGPWHLG-KLELDFNCEGTTVVVISENCGTRGPSI   |
| DENV4     | WIESS-KNQTWQIEKASLIEVKTCLWPKTHTLWSNGVLESQMLIPKAYAGPFSQHNRRPGYHTQTAGPWHLG-KLEIDFGCEPGTTVTIQEDCDHRGPSL   |
| ZIKV      | WIESE-KNDTWRLKRAHLIEMKTCEWPKSHTLWTDGYEESDLIIPKSLAGPLSHHNTREGYRTQVKGPHSE-ELEIRFECEPGTKVYVEETCGTRGPSL    |
| YFV       | WMGSHEVNGTWMIIHTLEALDYKECEWPLTHTI-GTSVEESEMFMPRSIGGPVSSSHNIPGYKVQTNGPWWQV-PLEVEREACPGTSVIIDGNCDDGRGKST |

  

|           |                                                           |
|-----------|-----------------------------------------------------------|
| Ruler 1   | 310 320 330 340 350                                       |
| Consensus | RTTTASGKIItEWCRSCSTLPLPLRFrgEDGQWYGMERPxkEkEENLVkSgVxA    |
| ILHV      | RTTTASGRITRDWCKNCTLPLPLRFMAAGENCWYGMERPRKRENEETLIKSKVSA   |
| ROCV      | RTTTASGKVIIRDWCKNCTMPPLRFTTKNGCWYGMERPKHESEETLIKSKVTA     |
| WNV       | RTTTESGKLIIDWCCRSCSTLPLPLRYQTDSGCWYGMERPRQRHDEKTLVQSQVNA  |
| JEV       | RTTTDSGKLIIDWCCRSCSLPLPLRFRTENGCWYGMERPRVRHDETTLVRSQVDA   |
| DENV1     | RTTTVTGKTIHEWCCRSCSTLPLPLRFKGEDGCWYGMERPVKEKEENLVKSMVSA   |
| DENV2     | RTTTASGKLIIEWCCRSCSTLPLPLRYRGEDGCWYGMERPLKEKEENLVNSLVTA   |
| DENV3     | RTTTVSGKLIIEWCCRSCSTLPLPLRYMGEDGCWYGMERIPINEKEENMVKSLSASA |
| DENV4     | RTTTASGKLVITWCCRSCSTMPPLRFLGEDGCWYGMERPLPSEKEENMVKSQVSA   |
| ZIKV      | RSTTASGRVIEEWCCRSCSTMPPLSFRAKDGCWYGMERPRKPEENSLVRSMVTA    |
| YFV       | RSTTDSGKLIIEWCCRSCSTMPPVFSFHSGDGCWYPMERIPRKTHESHLVRSWVTA  |

**Supplementary Figure S2: Alignment of Individual Proteins Across Multiple Flaviviruses.** Individual proteins from representative flaviviruses were aligned using the Clustal Omega algorithm in MegAlign Pro v17.2.1 (DNASTAR, Madison, WI). Amino acids are colored by side chain chemistry: aromatic residues (F, W, and Y) are yellow, acidic residues (D and E) are red, basic residues (R, H, and K) are blue, nonpolar residues (A, G, I, L, M, P, and V) are orange, and polar residues (C, N, Q, S, and T) are green). Gaps are represented as dashes. Black rectangles designate cysteine residues predicted to form disulfide bridges.

# NS2A

|           |                                                                                                                                                                                                         |
|-----------|---------------------------------------------------------------------------------------------------------------------------------------------------------------------------------------------------------|
| Ruler 1   | 1 10 20 30 40 50 60 70 80 90                                                                                                                                                                            |
| Consensus | - g g g x i D p F x L G L L x m f l f t x E V L R k R w T a K x x i p x v l x l L x v l i l G g x T y x D L x R y v l l V G A a F a E - N s G G D V t H L A L i A a F K i q P a f l V g f f L R k - W T |
| ILHV      | G N G Q T I E P F Q L G I L M A F V F T Q E V L R R R W T A N L A L P T S A L L M A C F I F G G F T Y L D L F R Y F I L V G A A F A E A N S G G D V V H L A M I A A F N I Q P A L V T T F F R K N W T   |
| ROCV      | G T G N D I C R F Q L G L L M A F V F T Q E V L R K R W T A R L A L P T A A L L A C F V L G A F T Y S D M I R Y F V L V G C A F A E S N S G G D V I H L A L I A V F N I Q P A A L V S T F F R N R W T   |
| WNV       | Y N A D M I D P F Q L G L L V F L A T Q E V L R K R W T A K I S M P A I L I A L L V L V F G G I T Y T D V L R Y V I L V G A A F A E S N S G G D V V H L A L M A T F K I Q P V F M V A S F L K A R W T   |
| JEV       | F N G E M V D P F Q L G L L V M F L A T Q E V L R K R W T A R L T I P A V L G A L L V L M L G G I T Y T D L A R Y V V L V A A F A E A N S G G D V L H L A L I A V F K I Q P A F L V M N M L S T R W T   |
| DENV1     | - G S G E V D S F S L G L L C I S I M I E E V M R S R W S R K M L M T G T L A V F L L T M G Q L T W N D L I R L C I M V G A N A S D - K M G M G T T Y L A L M A T F R M R P M F A V G L L F R R - L T   |
| DENV2     | - G H G Q I D N F S L G V L G M A L F L E E M L R T R V G T K H A I L L V A V S F V T L I T G N M S F R D L G R V M V M V G A T M T D - D I G M G V T Y L A L L A A F K V R P T F A A G L L L R K - L T |
| DENV3     | - G S G K V D N F T M G V L C L A I L F E E V M R G K F G K K H M I A G V L F T F V L L S G Q I T W R D M A H T L I M I G S N A S D - R M G M G V T Y L A L I A T F K I Q P F L A L G F F L R K - L T   |
| DENV4     | - G Q G T S E T F S M G L L C L T L F V E E C L R R V T R K H M I L V V V T L C A I I L G G L T W M D L L R A L I M L G D T M S G - R M G - G Q I H L A I M A V F K M S P G Y V L G I F L R K - L T     |
| ZIKV      | G S T D H M D H F S L G V L V I L L M V Q E G L K K R M T T K I M S T S M A V L V M I L G G F S M S D L A K L V I L M G A T F A E M N T G G D V A H L A L V A A F K V R P A L L V S F I F R A N W T     |
| YFV       | - - - G E I H A V P F G L V S M M I A M E V V L R K R Q G P K Q M L V G G V V L L G A M L V G Q V T L D L L K L T V A V G L H F H E M N N G G D A M Y M A L I A A F S I R P G L L I G F G L R T L W S   |

|           |                                                                                                                                                                                                       |
|-----------|-------------------------------------------------------------------------------------------------------------------------------------------------------------------------------------------------------|
| Ruler 1   | 110 120 130 140 150 160 170 180 190                                                                                                                                                                   |
| Consensus | x R E n I L L x x G a A m x q m A - s d l p - - - i x l m e l l n x i A L a w M i L K A v T f f t t s q l a m P l A L L T P p x r x l l l - - d a w R x l l l i G v v s l i p x x x s s a k K k       |
| ILHV      | N R E N M I L I I A A A C T Q M A C M E L K - - - I E L F H V M N S L S L A W M I L K A L T T G T T S T A M P F L A A L S P P M N W L G L - - D V V R C L L I M A G V A A L I S E R R E S L A K K K   |
| ROCV      | N R E N L L V I A A A A Q M A W S D V G - - - I E I M P I M N A M A L W M I L K A V S I G T V S T I A M P I L S G L A P P M E W F G L - - D V L R C L L I V G V A A L I K E R K E N L A K K K         |
| WNV       | N Q E N I L L M L A A V F F Q M A Y H D A R Q I L L W E I P D V L N S L A V A W M I L R A I T F T T T S N V V V P L L A L L T P G L R C L N L - - D V Y R I L L M V G I G S L I R E K R S A A A K K K |
| JEV       | N Q E N V V L V L G A A F F Q L A S V D L Q - - - I G V H G I L N A A A I A W M I V R A I T F P T T S S V T M P V A L L T P G M R A L Y L - - D T Y R I L L V I G I C S L L Q E R K K T M A K K K     |
| DENV1     | S R E V L L L T V G L S L V A S - - V E L P - - - N S L E E L G D G L A M I M M L K L L D F Q S H Q L W A T L L S L T F V K T T F S L H - - Y A W K T M A M I L S I V S L F P L C L S T T S Q K -     |
| DENV2     | S K E L M M T T I G I V L L S Q - - S T I P - - - E T I L E L T D A L A L G M M V L K M V R K M E K Y Q L A V T I M A I L C V P N A V I L Q - - N A W K V S C T I L A V V S V S P L F T S S Q Q K -   |
| DENV3     | S R E N L L L G V G L A M A A T - L R L P - - - E D I E Q M A N G I A L G M A L K L I T Q F E Y Q L W T A L V S L T C S N T I F T L T - - V A W R T A T L I L A G I S L L P V C Q S S M R K -         |
| DENV4     | S R E T A L M V I G M A M T T V - L S I P - - - H D L M E F I D G I S L G L I L L M V T H F D N T Q V G T L A L S L T F I R S T M P L V - - M A W R T I M A V L F V V T L I P L C R T S C L Q K Q     |
| ZIKV      | P R E S M L L A L A S C L L Q T A I S A L E - - - G D L M V L I N G F A L A W L A I R A M A V P R T D N I A L P I L A A L T P L A R G T L L - - V A W R A G L A T C G G I M L L S L K G K G S V K K N |
| YFV       | P R E R L V L T L G A A M V E I A L G G M M - - - G G L W K Y L N A V S L C I L T I N A V A S R K A S N T I L P L M A L L T P V T M A E V R L A T M L F C T V V I I G - - V L H Q N S K D T S M Q K T |

|           |                                                                   |
|-----------|-------------------------------------------------------------------|
| Ruler 1   | 210 220 230                                                       |
| Consensus | g a w L p x i a l a - t G x f s P l - l x x l i x l t r x n k K R |
| ILHV      | G A L L I S A A L A L T G A F S P L V L Q G A L M F T Q S L G K R |
| ROCV      | G A L L I S A G L A L T G A F S P L V L Q G A L M L S E C A T K R |
| WNV       | G A S L L C L A L A S T G L F N P M I L A A G L I A C D P N R K R |
| JEV       | G A V L L G L A L T S T G W F S P T T I A A G L M V C N P N K K R |
| DENV1     | T T W L P V L L G S - L G C - K P L - T M F L I T E N K I W G R K |
| DENV2     | A D W I P L A L T I - K G L - N P T - A I F L T T L S R T N K K R |
| DENV3     | T D W L P M T V A A - M G V - P P L - P L F I F S L K D L K R R   |
| DENV4     | S H W V E I T A L I - L G A - Q A L - P V Y L M T L M K G A S K R |
| ZIKV      | L P F V M A L G L T A V R V D P I N V V G L L L L T R S G K R -   |
| YFV       | I P L V A L T L S Y L G L T Q P F L G L C A F L A T R I F G R R   |

**Supplementary Figure S2: Alignment of Individual Proteins Across Multiple Flaviviruses.** Individual proteins from representative flaviviruses were aligned using the Clustal Omega algorithm in MegAlign Pro v17.2.1 (DNASTAR, Madison, WI). Amino acids are colored by side chain chemistry: aromatic residues (F, W, and Y) are yellow, acidic residues (D and E) are red, basic residues (R, H, and K) are blue, nonpolar residues (A, G, I, L, M, P, and V) are orange, and polar residues (C, N, Q, S, and T) are green. Gaps are represented as dashes. Black rectangles designate cysteine residues predicted to form disulfide bridges.

# NS2B

|           |                                                                                                                           |
|-----------|---------------------------------------------------------------------------------------------------------------------------|
| Ruler 1   | 1 10 20 30 40 50 60 70 80 90                                                                                              |
| Consensus | SWPx nEv l xAVGLv saLAGsLAKxDip -MAGPl aagGLL i v xYVxSGkSxDxwLE RAADV sWE e eAE I TG sSpRLDVeLDdDGDfKxxxdegvPm l t w l l |
| ILHV      | GWPASEVLTA VGMTFALAGSVARLDGGTMAIPLATMAI LAVAYVLSGKSTDMWLE RCADISWINEAEITGTSPrLDVVELDNGDfKMINDPGVPMWMTWC                   |
| ROCV      | GWPASEVLTA IGMTIALAGSVARLDsGTMAIPLATTSILFVS YVLSGKSTDMWIERTADISWESDAEITGSSERVDVRLDDDGfQLMNDPGAPWKIWMML                    |
| WNV       | GWPATEVMTAVGLMFAIVGGLAELDIDSMAIPMTIAGLMFAAFVVISGKSTDMWIERTADISWESDAEITGSSERVDVRLDDDGfQLMNDPGAPWKIWMML                     |
| JEV       | GWPATEFLSAVGLMFAIVGGLAELDIESMSIPFMLAGLMAVS YVVS GKATDMWLE RAADISWEMDAAITGSSRRLDVKLDDDGfDfHLIDDPGVPWKVWVVL                 |
| DENV1     | SWPLNEGIMAVGIVSILLSSLLKNDVP -LAGPLIAGGMLIACYVISGSSADLSLEKAAEVSWEEAEHSGASHNILEVVEQDDGTMKIKDEERDDTLTILL                     |
| DENV2     | SWPLNEA IMAVG MVSI LASSLLKNDIP -MTGPLVAGGLLTVCYVLTGRSADLELE RAADV KWEDQAEISGSSPILSITISEDGSMSIKNEEEEQILTILL                |
| DENV3     | SWPLNEGIMAVGLVSI LASSLLRNDVP -MAGPLVAGGLLTVCYVLTGTSADLTVEKAADV TWEEAEQTGVSHNLMITVDDDGTMRIKDDETENILTVLL                    |
| DENV4     | SWPLNEGIMAVGLVSI LASSLLKNDVP -LAGPMVAGGLLLAAYVMSGSSADLSLEKAAENVQWDEMADITGSSPIIEVKQDEDDGSFSIRDIEETNMITLLV                  |
| ZIKV      | SWPPSEVLTA VGLICALAGGFAKADIE -MAGPMAAVGLLIVSYVVS GKSVDMYIERAGDITWEKDAEVTGNSPrLDVALDESGDfSLVEEDGPPMREIIL                   |
| YFV       | SIPVNEALAAAGLVGVLAG -LAFQEMENFLGPIAVGGILMMLVSVAGRV DGLLELKKLGEVSWEEAEISGSSARYDVALSEQGEfKLLSEEKVPWDQVVM                    |

|           |                                                       |
|-----------|-------------------------------------------------------|
| Ruler 1   | 110 120 130                                           |
| Consensus | rmgLLa i s x x nPva l P v t x a g W x m x x K k t k R |
| ILHV      | RMGLMAMAA YNPVLIPVSMAGYWM TVKIHKR                     |
| ROCV      | RMGLMCAA YNPVLIPVSVAGYWM TRKIHKR                      |
| WNV       | RMVCLAISAYTPWAILPSVVGFWITLQYT KR                      |
| JEV       | RMSCIGLAALTPWAI VPAAFGYWLTLKTTKR                      |
| DENV1     | KATLLAISGVYPMSIPATL FVWYFWQKKKQR                      |
| DENV2     | RTGLLVISGLFPVSIPI TAAAWYLVEVKKQR                      |
| DENV3     | KTALLIVSGIFPYSIPATLLVWHTWQKQTQR                       |
| DENV4     | KLALITVSGLYPLAIPVTMTLWYMWQVK TQR                      |
| ZIKV      | KVVLMAICGMNP I AIPFAAGAWYVYVKTGR                      |
| YFV       | TS LALVGAAIHPFALLLVLAGWLFHVRGAR R                     |

**Supplementary Figure S2: Alignment of Individual Proteins Across Multiple Flaviviruses.** Individual proteins from representative flaviviruses were aligned using the Clustal Omega algorithm in MegAlign Pro v17.2.1 (DNASTAR, Madison, WI). Amino acids are colored by side chain chemistry: aromatic residues (F, W, and Y) are yellow, acidic residues (D and E) are red, basic residues (R, H, and K) are blue, nonpolar residues (A, G, I, L, M, P, and V) are orange, and polar residues (C, N, Q, S, and T) are green). Gaps are represented as dashes. Black rectangles designate cysteine residues predicted to form disulfide bridges.

# NS3

|           |                                                                                                            |
|-----------|------------------------------------------------------------------------------------------------------------|
| Ruler 1   | 1102030405060708090                                                                                        |
| Consensus | -gGV LWDPSPK EvgKa-eL t dGVYRIMq rGxLG syQvGVGVmqEGVFHTMWHVTRGAaLmxgeGRLEPsWxSVKxDLISYGGGWKLs akWxGgEEVQvI |
| ILHV      | -GGVMWDVPAPKQFGKT-ELKPGVYRVMTMGLGRYQSGVGVMWDGVFHTMWHVTTQGAALRNGEGRLNPTWGSVRDDLI SYGGKWKL SATWNGSEEVQMI     |
| ROCV      | -GGVLWDLPAPKQMGRS-DMKPGVYRVMTSGVLGSYQSGVGVMYDGVFHTMWHVTTQGAALRNGEGRLNPTWGSVRDDLI TYGGKWKL SATWDGTEEVQLI    |
| WNV       | -GGVLWDTPSPKEYKKG-DTTTGVYRIMTRGLLGSYQAGAGVMVEGVFHTLWHHTTKGAALMSGEGRLDPYWGVSVKEDRLCYGGPWWKLQHKWNGQDEVQMI    |
| JEV       | -GGVFWDTSPSPKPCSKG-DTTTGVYRIMARGILGT YQAGVGVMYENVFHTLWHHTTRGAAIMSGEGKLT PYWGSVKEDRIAYGGPWRFRDRKWNGTDDVQVI  |
| DENV1     | -SGVLWDTPSPPEVERA-VLDDGIYRILQRGLLGRSQVGVGVFQEGVFHTMWHVTRGAVLMYQGKRLPSWASVVKKDLISYGGGWRFGGSWNAGEEVQVI       |
| DENV2     | -AGVLWDVPSPPPVKGKAELEDGAYRIKQKGLIGYSQIAGGVYKEGTFHTMWHVTRGAVLMHKGKRIEPSWADVKKDLISYGGGWKLEGEWKEGEDEVQVL      |
| DENV3     | -SGVLWDVPSPPTTQKA-ELLEGVYRIKQQGIFGKTQVGVGQKEGVFHTMWHVTRGAVLTHNGKRLPENWASVVKKDLISYGGGWRLSAQWQKGEEVQVI       |
| DENV4     | -SGALWDVPSPAAQA-KLTEGVYRIMQRGLFGKTQVGVIHMEGVFHTMWHVTRGVSICHETGRLEPSWADVRNDMISYGGWRLGDKWDKEEDVQVL           |
| ZIKV      | -SGALWDVPAPKEVKKG-ETTDGVYRVMTRRLLGSTQVGVGVMQEGVFHTMWHVTKGAALRSGEGRLDPYWGVDVKQDLVSYCGPWWKLDAAWDGLSEVQLL     |
| YFV       | SGDVLWDIPTPKIIEECEHLEDGIYGI FQSTFLGASQRGVGVAQGGVFHTMWHVTRGAFLVRNGKKLIPSWASVKEDLVAYGGSWKLEGRWDGEEEVQLI      |

|           |                                                                                                           |
|-----------|-----------------------------------------------------------------------------------------------------------|
| Ruler 1   | 110120130140150160170180190                                                                               |
| Consensus | AVEPGKNpKNvQTKPGvFKTp-aGEIGAVxLDFPpGTSGPSI xNknGkVIGLYGNGVVtksGsYVSAI xQgErQeEgpp ee-fePeMLRKRqLTI LDLHP  |
| ILHV      | AVEPGKAAKNYQTKPGVFKTP-AGEIGAITLDFPKGTSGPSI INKAGEIIGLYGNGLVLASGAYVSAITQGERQEEETPEA-FTPDMLKKRRLTILDLHP     |
| ROCV      | AAEPGKPVKNFQTRPGVFKTP-AGEVGAITLDFPKGTSGPSI VNKAGAVIGLYGNGLVLSGAYVSAISQGERQEEEAPEA-FTPEMLRKRQLTILDLHP      |
| WNV       | VVEPGKNVKNVQTKPGVFKTP-EGEIGAVTLDFPTGTSGSPI VDKNGDVI GLYGNGVIMPNGSYISAIVQGERMDEPI PAG-FEPEMLRKKQITVLDLHP   |
| JEV       | VVEPGKAAVNIQTKPGVFRTF-FGEVGAVSLDYPRGTSGPSILD SNGDIIGLYGNGLVLDGGSYVSAIVQGRQEPEVPEA-YTPNMLRKRQMTVLDLHP      |
| DENV1     | AVEPGKNPKNVQTAPGTFTKTP-EGEVGAIALDFKPGTSGPSI VNRGKIVGLYGNGVVTS GTYVSAIAQAKASQEGPLPE-IEDEVFRKRNLTIMDLHP     |
| DENV2     | AL EPGKNPRAVQTKPGLF KTN-AGTIGAVSLDFS PGTSGPSI IDKKGKVVGLYGNGVVTRSGAYVSAIAQTEKSI E-DNPE-IEDDIFRKRRLTIMDLHP |
| DENV3     | AVEPGKNPKNFQTMPGIFQTT-TGEIGAIALDFKPGTSGPSI INREGKVVGLYGNGVTKNGGYVSGIAQTNAEPDGP TPE-LEEEMFKKRNLTIMDLHP     |
| DENV4     | AIEPGKNPKHVQTKPGLF KTL-TGEIGAVTLDFKPGTSGPSI INRKGKVI GLYGNGVVTKSGDYVSAITQAERTGE-PDY E-VDEDIFRKRRLTIMDLHP  |
| ZIKV      | AVPPGERARNIQTLPGIFKTK-DGDIGAVALDYPAGTSGPSILD KCGRVI GLYGNGVVINKGSYVSAITQGKREEETPVEC-FEPSMLKKKQLTVLDLHP    |
| YFV       | AAVPGKNVNVQTKPSSLFKVRNGGEIGAVALDYPGTSGPSI VNRNGEVI GLYGNGLIVGDNSVSAISQTEVKEEGKEELQEIPTMLKKGMTILDFHP       |

|           |                                                                                                            |
|-----------|------------------------------------------------------------------------------------------------------------|
| Ruler 1   | 210220230240250260270280290                                                                                |
| Consensus | GAGKTRRxLPqIVREAIKRRRLRTIILAPTRVVAAEMaEALRGLPIRYQTsAVkaEHxGrEIVDIMCHATxTmRLLSPPvRVPNYNLixMDEAHFTDPASIA     |
| ILHV      | GAGKTRRVIPQIVRECVKARLRTVILAPTRVVAAEMAEALRGLPIRYQTS AVKA EHS GNEIVDVMCHATLTQRL LTPAKVPNYNVFVMD EAHFTDPASIA  |
| ROCV      | GAGKTRRVIPQIVREAVKQRLRTVILAPTRVVAAEIAEALRGLPVRFQTS AVKA EHS GTEIVDVMCHATLTQRLMT PMRVPNYNV FVMD EAHFTDPASIA |
| WNV       | GAGKTRRI LPQIIKEAINRRRLTAVLAPTRVVAAEMAEALRGLPIRYQTS AVPREHNGNEIVDVMCHATLTHRLMSPHRVPNYNLFVMD EAHFTDPASIA    |
| JEV       | GSGKTRKILPQIIKDAIQQLRTAVLAPTRVVAAEMAEALRGLPVRYQTS AVQREHQGNEIVDVMCHATLTHRLMSPNRVPNYNLFVMD EAHFTDPASIA      |
| DENV1     | GSGKTRRYLPAIVREAIRNVRTLVLAPTRVVASEMAEALKGMP IRYQT TAVKSEHTGKEIVDLMCHATFTMRL LSPVRVPNYNMIIMDEAHFTDPASIA     |
| DENV2     | GAGKTKRYLPAIVREAIKRGLRTLILAPTRVVAAEMEEALRGLPIRYQT PAIRAEHTGREIVDLMCHATFTMRL LSPVRVPNYNLIIMDEAHFTDPASIA     |
| DENV3     | GSGKTRKYLPAIVREAIKRRRLRTLILAPTRVVAAEMEEALKGLPIRYQT TATKSEHTGREIVDLMCHATFTMRL LSPVRVPNYNLIIMDEAHFTDPASIA    |
| DENV4     | GAGKTKRILPSIVREALKRRRLRTLILAPTRVVAAEMEEALRGLPIRYQT PAVKSEHTGREIVDLMCHATFTTTRL LSTTRVPNYNLIVMDEAHFTDPSSXA   |
| ZIKV      | GAGKTRRLPEIVREAIKRRRLRTVILAPTRVVAAEMEEALRGLPIRYQMTAVNTHSGREIVDLMCHATFTSLRLQPIRVPNYNLIIMDEAHFTDPSSIA        |
| YFV       | GAGKTRRFLPQILAECARRRLRTLVLAPTRVVLS EMK EAFHGLDVKFHTQAFSAHSGS GREVIDAMCHATLT YRMLEPTRVVNWEVIIMDEAHFLDPASIA  |

|           |                                                                                                          |
|-----------|----------------------------------------------------------------------------------------------------------|
| Ruler 1   | 310320330340350360370380390                                                                              |
| Consensus | ARGYISTRVEmGEAAAI FMTATPPGTtDPPFxSNaPI xDeErEI PeRaWNSGfEWITDyTGKTVWFVPSxKaGNeIaXcLRKAGKKV IQLxRKTFDTEYq |
| ILHV      | ARGYISTKVELGEAAAI FMTATPPGTTDPPFDSNAPIIDQEAEIPDRAWNSGF EWITEYTGKTVWFVPSVRMGNEIAMCLTKAGKKV IQLNRKSYDSEYQ  |
| ROCV      | ARGYISTKVESGEAAAI FMTATPPGTIDPPFDSNSPIIDQEAEIPDRAWNSGF EWITDYTGKTVWFVPSVRSNGNEIAMCLTKAGKKV IQLNRKSYETEYQ |
| WNV       | ARGYISTKVELGEAAAI FMTATPPGTSDFPFSNSPIISDLQTEIPDRAWNSGYEWITEYTGKTVWFVPSVKMGNEIALCLQRAGKKV VQLNRKSYETEYP   |
| JEV       | ARGYIATKVELGEAAAI FMTATPPGTTDPPFDSNAPIHDLQDEIPDRAWSSGYEWITEYAGKTVWFVVASVKMGNEIAMCLQRAGKKV IQLNRKSYDTEYP  |
| DENV1     | ARGYISTRVGMGEAAAI FMTATPPGSVEAFPQSNNAVIQDEERDIPERSWNSGYDWITDFPGKTVWFVPSIKSGNDIANCLRKNGRKKVQLSRKTFDTEYQ   |
| DENV2     | ARGYISTRVEMGEAAGI FMTATPPGSRDPFQSNAPIIMDEEREIPERSWSSGHEWVTD FKGT VWFVPSIKAGNDIAACL RKNGKKV IQLSRKTFDSEYV |
| DENV3     | ARGYISTRVGMGEAAAI FMTATPPGTADAFPQSNAPIQDEERDIPERSWNSGNEWITDFVGKTVWFVPSIKAGNDIANCLRKNNGKKV IQLSRKTFDTEYQ  |
| DENV4     | ARGYISTRVEMGEAAAI FMTATPPGTDPPFQSNNSPIIDEREIPERSWNTGFDWITDYQGKTVWFVPSIKAGNDIANCLRKNKSGKKV IQLSRKTFDTEYP  |
| ZIKV      | ARGYISTRVEMGEAAAI FMTATPPGTRDAFPDSNSPIMDTEVEVPERAWSGFDWVTDHSGKTVWFVPSVRNGNEIAACLTKAGKRV IQLSRKTFETEFQ    |
| YFV       | ARGWAAHRRANESATILMTATPPGTSDEFPHSNGEIEDVQTDIPSEPWNTGHDWILADKRPTAWFLPSIRAANVMAASLRKAGKSVVVLNRKTFEREYP      |

|           |                                                                                                         |
|-----------|---------------------------------------------------------------------------------------------------------|
| Ruler 1   | 410420430440450460470480490                                                                             |
| Consensus | KtKnnDWDfFvTTDIS EGMANFkAdRVIDxRrCxKPVILtdGeeRVILaGpMPVTaSA460AQQRRRIGRNPnqeGDeYiYgGpxIedDedHAHWtEAKMLL |
| ILHV      | KCKGNDWDFVITTDISEMGANFGAHRVIDSRCKVKPVIL-DGDDRVLMNGPAPITPASAAQRRRIGRDPQTQSGDEYFYGGPTTTDDTGHAHWIEAKILL    |
| ROCV      | KCKGNDWDFVVTDDISEMGANFGAHRVIDSRCKVKPVIINDGEGRVQLNGPLITASSAAQRRRGVRGRDPTQSGDEYFYGGPI TNDTGHAHWIEAKMLL    |
| WNV       | KCKNDWDVFVITTDISEMGANFASRVIDSRSVKPTIITEGEGRVILGEP SAVTASAAQRRRIGRNPQSQSGDEYCYGGHTNEDDSNFAHWTEAKIML      |
| JEV       | KCKGNDWDFVITTDISEMGANFGASRVIDCRKSVKPTILEEGEGRVILGNPSPITSA460AQQRRRGVRGNPNQVGDEYHYGGATSEDDSNLAHWTEAKIML  |
| DENV1     | KTKNNDWDFVVTDDISEMGANFRADRIDPRRCLKPVILKDGPERVILAGPMPVTVASAAQRRRIGRNPQKQEGDQYIYMGQPLNND EDAHWT EAKMLL    |
| DENV2     | KTRTNDWDFVVTDDISEMGANFKADRIDPRRCMKPVILT DGEERVILAGPMPVTHSSAAQRRRIGRNPKNENDQYIYMGEPLENDEDCAHWKEAKMLL     |
| DENV3     | KTCLNDWDFVVTDDISEMGANFKADRIDPRRCLKPVILTNGPERVILAGPMPVTVASAAQRRRGVRGNPQKENDQYIFMGQPLNND EDAHWT EAKMLL    |
| DENV4     | KTKLTDWDFVVTDDISEMGANFRAGRVIDPRRCLKPVILTDGPERVILAGPIPVTPASAAQRRRIGRNPQAQEDDQYVFGDPLKNDEDAHWT EAKMLL     |
| ZIKV      | KTKNQEWDFVITTDISEMGANFKADRIDSRRCLKPVILD--GERVILAGPMPVTHSSAAQRRRIGRNPKNKPGDEYMYGGGCAETDEGHAWLEARMLL      |
| YFV       | TIKQKKPDFILATDIAEMGANLCVERVLDCRTAFKPVLVDEG-RKVAIKGPLRISASSAAQRRRIGRNPNRDGDSEYYS EPTSEDNAHHVCWLEASMLL    |

|           |                                                                                                               |
|-----------|---------------------------------------------------------------------------------------------------------------|
| Ruler 1   | 510520530540550560570580590                                                                                   |
| Consensus | DNIntPxGI IIAqLYgPEREKvAiDGEYRLRGEqRKfFVELMRrGDLPVWLxYKVA sAGI xYtDRRWCFDGP rNNxILEDNmEV-EIWTkeGExKkLRPR      |
| ILHV      | DN IQLQNLGLVAQLYGPREDKVFTT DGEYRLRGEQKKNFVEFLRTGDLPVWL SYKVAEAGYAYTD RRRWCFDGPANNTILEDNNEV-EIWT RQGEKRILRPR   |
| ROCV      | DN IQLQNLGLVAQLYGPREDKVFTT DGEYRLRGEQKKHFDVFLMRGTGDLPVWL SYKVAEAGIYTD RRRWCFDGPWNNTILEDNTEV-EIWT RQGERKVL RPR |
| WNV       | DN I NMPNGLIAQFYQPEREKVYTMDGEYRLRGEERKNFLELLRTADLPVWLAYKVAAAGVSYH DRRWCFDGPRTNTILEDNNEV-EVITKLGERKILRPR       |
| JEV       | DN I HMPNGLVAQLYGPEREKAL TMDGEYRLRGEQKKNFLELLRTADLPVWLAYKVASNGI QYTD RKWCFDGPRTNAILEDNTEV-EIVTRMGERKILKPR     |
| DENV1     | DN INTPEGIIPALFEPEREKSAIDGEYRLRGEARKTFVELMRGDLPVWL SYKVASGEGFYSDRRWCFDGERNNQVLEENMDV-EIWTKEGERKKLRPR          |
| DENV2     | DN INTPEGIIPSMFEPEREKVDAIDGEYRLRGEARKTFV DLMRRGDLPVWLAYRVAAEGIN YADRRWCFDGI KNNQIILEENVEV-EIWTKEGERKKLKPR     |
| DENV3     | DN INTPEGIIPALFEPEREKSAIDGEYRLRGESRKTFVELMRGDLPVWL AHKVASG I KYTD RKWCFDGERNNQIILEENMDV-EIWTKEGEKKLRPR        |
| DENV4     | DN IYTPGEGIIPTLFGPEREKNSAIDGEFRLRGEQRKTFVELMRGDLPVWL SYKVASAGISYKDRWCFGTGERNNQIILEENMEV-EIWTREGEKKLRPK        |
| ZIKV      | DN IY LQDGLIASLYRPEADKVAIEGEFKLRTEQRKTFVELMRGDLPVWLAYQVASAGI TYTD RRRWCFDGTNTNTIMEDSVPA-EVWT KYGEKRVLKPR      |
| YFV       | DNMEVRGGMVAPLYGVEGKT PVS PGEMRLRDDQRKYFRELVRNCDLPVWL SWQVAKAGLKTND RKWCFEGPPEEHEILNDSGETVKCRAPGGAKKPLRPR      |

|           |                             |
|-----------|-----------------------------|
| Ruler 1   | 610620                      |
| Consensus | WIDARVYS Dp qALKEfKEFAAGxR  |
| ILHV      | WSDARVYCDNQALRSFK EFAAGKR   |
| ROCV      | WSDARVYS DNQALRAFKEFAAGKR   |
| WNV       | WIDARVYS DHQALKAFKDFASGKR   |
| JEV       | WLDARVYADHQALKWFKDFAAGKR    |
| DENV1     | WLDARTYS DPLALREFKEFAAGRR   |
| DENV2     | WLDARTIYS DPLALKEFK EFAAGRK |
| DENV3     | WLDARTIS DPLALKEFKDFAAGRK   |
| DENV4     | WLDARVYADPMALKDFKEFASGRK    |
| ZIKV      | WMDARVCS DHAALKSFKEFAAGKR   |
| YFV       | WCDERVSSDQSALSEFIKFAEGRR    |

**Supplementary Figure S2: Alignment of Individual Proteins Across Multiple Flaviviruses.** Individual proteins from representative flaviviruses were aligned using the Clustal Omega algorithm in MegAlign Pro v17.2.1 (DNASTAR, Madison, WI). Amino acids are colored by side chain chemistry: aromatic residues (F, W, and Y) are yellow, acidic residues (D and E) are red, basic residues (R, H, and K) are blue, nonpolar residues (A, G, I, L, M, P, and V) are orange, and polar residues (C, N, Q, S, and T) are green). Gaps are represented as dashes. Black rectangles designate cysteine residues predicted to form disulfide bridges.

# NS4A and 2K

|           |                                                                                                          |
|-----------|----------------------------------------------------------------------------------------------------------|
| Ruler 1   | 1 10 20 30 40 50 60 70 80 90                                                                             |
| Consensus | -sAlxli evlGRIPdhtxKtrxALDNLyVLxTaEkGGRAYRhALEELPxTLETxxLi alIgvxTgGxFIfIMxxKGIGKxgIGxlvIxaaxxLLWmAeV    |
| ILHV      | -SAGSVMEVVMGRMPDYFWTKTLNAADNLVVLATANKGGRAHQAALEELPDVTETILLMTMMCVASLGMFALMVHRRGLGKTGLGTLVLATVTVLLWISDV    |
| ROCV      | -SAGSMMDVVMARMPDYFWTKTMNAADNLVVLATTEKGGRAHRAALEELPDLTETVLLIAMMSLASCGMLALMMQRKGIGKTGMGTAVLTAVTILLWMADV    |
| WNV       | -SQIGLIEVLGKMPHFHMGKTWEALDTMYVVATAEKGGRAHRMALEELPDALQTIALIALLSVMTMGVFFLLMQRKGIGKIGLGGAVLG VATFFCWMAEV    |
| JEV       | -SAVSFIEVLGRMPFHFHMGKTREALDTMYLVATAEKGGKAHRMALEELPDAL ETITLIVAIVMTGGFFLLMMQRKGIGKMG LGALVLT LATFFLWAAEV  |
| DENV1     | SVSGDLILEIGKLPHLTQRAQNALDNLVMLHNSEQGGKAYRHAMEELPDITETLMLLALIAVL TGGVTLFFLSGRGLGKTSIGLLCVIASSALLWMA SV    |
| DENV2     | SLTLNLITETMGR LPTFTMQKARDALDNLAVLHTAEAGGRAYNHALSELPETLETLLLLTLLATVTGGIFLFLMSGRGIGKMTLGMCCIITASILLWYAQI   |
| DENV3     | SIALDLVTEIGRVP SHLAHRTRNALDNLVMLHTSEHGGRAYRHAVEELPETMETLLLLGLMILLTGGAMLFLISGKGIGKTSIGLICVIASSGMLWMADV    |
| DENV4     | SITLDILTEIASLPTVLYSSRAKLALDNLVMLHTTERGGRAYQHALLPESETLMLVALLGAMTAGIFLFFMQGKGIGKLSMGLIAIAVASGLLWVAEI       |
| ZIKV      | GAALGVMEALGTLPGHMTERFQEAIDNLAVLMRAETGSRPYKAAAAQLPETLETIMLLGLLGTVSLGIFFFVLMRNKGIGKMGFGMVTLGASAWLMWLSEI    |
| YFV       | -GAAEVLVVLSELDPFLAKKGGEAMD TISVFLHSEEGSRAYRNALSMMP EAMTIVMLFILA GLLTSGMVIFFMSPKGISRMSMAMGT MAGCGYLMFLGGV |

|           |                                                      |
|-----------|------------------------------------------------------|
| Ruler 1   | 110 120 130 140                                      |
| Consensus | pptxIAGxllleFILMVVLIPEPEKQRS pQDNQLAyxIliclTLvg aVAA |
| ILHV      | PAPKIAGVLLIAFLLMIVLIPEPEKQRSQTDNHLAIFLVCVLLLIGAVSA   |
| ROCV      | PAPKIAGVLLISFLLMIVLIPEPEKQRSQTDNHLAVFLICALLLVSAVSA   |
| WNV       | PGTKIAGMLLLSLLMIVLIPEPEKQRSQTDNQLAVFLICVMTLVSAVAA    |
| JEV       | PGTKIAGTLLIALLLMVVLIPEPEKQRSQTDNQLAVFLICVLT TVVGMVAA |
| DENV1     | EPHWIAASIIIEFFLMVLLIPEPDQRTPQDNQLAYVVIGLLFMILTAA     |
| DENV2     | QPHWIAASIIIEFFLVLLIPEPEKQRTTPQDNQLTYVVIAILTVVAATMA   |
| DENV3     | PLQWIAASIVLEFFMMVLLIPEPEKQRTTPQDNQLAYVVIGILTAAIVAA   |
| DENV4     | QPQWIAASIIIEFFLMVLLIPEPEKQRTTPQDNQLIYVILTILTIIGLIAA  |
| ZIKV      | EPARIACVLIVVFLLLLVLLIPEPEKQRS pQDNQMAIIMVAVGLLGLITA  |
| YFV       | KPTHISYIMLIFFFVLMVVLIPEPGQRS IQDNQVAYLIIGILT LVSVVAA |

**Supplementary Figure S2: Alignment of Individual Proteins Across Multiple Flaviviruses.** Individual proteins from representative flaviviruses were aligned using the Clustal Omega algorithm in MegAlign Pro v17.2.1 (DNASTAR, Madison, WI). Amino acids are colored by side chain chemistry: aromatic residues (F, W, and Y) are yellow, acidic residues (D and E) are red, basic residues (R, H, and K) are blue, nonpolar residues (A, G, I, L, M, P, and V) are orange, and polar residues (C, N, Q, S, and T) are green). Gaps are represented as dashes. Black rectangles designate cysteine residues predicted to form disulfide bridges.

# NS4B

|           |                                                                                                          |
|-----------|----------------------------------------------------------------------------------------------------------|
| Ruler 1   | 1 10 20 30 40 50 60 70 80 90                                                                             |
| Consensus | NEMGWLeXtTKDLGxIfggr-e---we-sxIDIDLPAAsAwTLyAvATTVLTPmLRHIIItNsYxNxSLtAlAnQAsvLfGLxKGwPFxkmDLgVpLL       |
| ILHV      | NEMGWLETTTKKDIGKLFRRSSGDTQEQSTWQSW--APEVRAATAWAGYAGLTVFLTPLFRHLITTTQYVSFSLTAITAQASALFGLSAGYPFVGI DLAVGFL |
| ROCV      | NEMGWLDTTKRDIGKLFSGPSAV-TTSRWELPKLALALKPATAWAGYAGMTMLTLPFLRHLITTTQYVSFSLTAITSQASALFGLNSGYPFVGVDL SVVFL   |
| WNV       | NEMGWLDKTKSDISSLFGRIEVKENFSM--GEFLDLRPAWASLYAVTTAVLTPLKHLITSDYINTSLTSINVQASALFTLARGFPFVDVGVSAALL         |
| JEV       | NEYGMLEXTKADLKSMFGGKTQASGLTGL--PSMALDLRPAWALYGGSTVVLTPLKHLITSEYVTTSLASINSQAGSLFVLPRGVPFTDLDLTVGLV        |
| DENV1     | NEMGLLETTTKKDLGIGHAAA-ENH---HHAAMLVDLHPASAWTLYAVATTITPMMRHTIENTTANISLTAIANQAAILMGLDKGWPI SKMDIGVPLL      |
| DENV2     | NEMGFLEKTKKDLGLSITT-Q-Q---PESNILDLRPAWATLYAVATTFTVTPMLRHSIENSSVNSLTAIANQATVLMGLGKGWPLSKMDIGVPLL          |
| DENV3     | NEMGLLETTTKRDIGMSKEPG-V-V---SSTSYLDVLDHPASAWTLYAVATTITVTPMLRHTIENSTANVSLAAIANQAVVLMGLDKGWPI SKMDIGVPLL   |
| DENV4     | NEMGLIEKTKTDFGFYQVK-----TETTLVDLDRPASAWTLYAVATTITLTPMLRHTIENTSANLSLAAIANQAAVLMGLGKGWPLHRMDLGVPLL         |
| ZIKV      | NELGWLERTKNDIAHLMRREEGA-----TMGFSMDILDRPASAWIYAALTITPAVQHAVTTSYNNYSLMAMATQAGVLFMGKGMPFYAWDLGVPLL         |
| YFV       | NELGMLEKTKEDLFGKKNLIPS--SASPW--SWPDLDLKPGAATVVYGVITVMTLSPLMHWHIKVEYGNLSLSGIAQSASVLSFMDKGI PFMKMNI SVIIL  |

|           |                                                                                                          |
|-----------|----------------------------------------------------------------------------------------------------------|
| Ruler 1   | 110 120 130 140 150 160 170 180 190                                                                      |
| Consensus | aIGCYsQvNpxTLxAAixLLvAHYAxiGPGIQAxAtrxAQKRTAAGIMKNPVDGIVATDxxevx-ydPkfEKKLGQVMLLVLCaaqxLImRTtwalcEa      |
| ILHV      | LLGCGYQYNLPTAVATGLLLLLAHYGYMIPGWQAAMRAAQRRTAAGVMKNNAVVDGIVATDIPEDVTATPI TEKKLGQILLILL CGASLLVVKFDTMVLVEA |
| ROCV      | LVGCGYQYNLPTTMATIGLLLVGHYAFMIPGWQAAMRAAQRRTAAGVMKNNAVVDGIVATDIPEDMTATPI TEKKMGQVMLLI ISALAILLNPDTMTVVEG  |
| WNV       | AAGCGWQVTLTVTVTATLLFCHYAYMVPGWQAAMRSAQRRTAAGIMKNNAVVDGIVATDVPELERTTPI MQKKVQGIMLILVSLAAVVVNP SVKTVREA    |
| JEV       | FLGCGWQITLTTTTLTAMVLA TLHYGYMIPGWQAALRAAQRRTAAGIMKNNAVVDGMVATDVPELERTTPLMQKKVGVQLLIGVSVAAFLVNPNTTVREA    |
| DENV1     | ALGCGYQYNPLTLTAAVFMLVAHYAII GPGLQAKATREAAQRRTAAGIMKNPTVDGIVATDLDPPV-YDAKFELQGLQIMLLILCTSQILLMRTTWALCEA   |
| DENV2     | AIGCGYSQVNPITLTAALXLLVAHYAII GPGLQAKATREAAQRRTAAGIMKNPTVDGITVIDLDPPI-YDPKFEKQLGQVMLLVLCVTQVLMRTTWALCEA   |
| DENV3     | ALGCGYSQVNPITLAAAVLLLVTHYAII GPGLQAKATREAAQRRTAAGIMKNPTVDGIMTVIDLDPVI-YDSKFEKQLGQVMLLVLCAYQLLLMRTSWALCEV |
| DENV4     | AMGCGYSQVNPITLIASLVMLLVHYAII GPGLQAKATREAAQRRTAAGIMKNPTVDGITVIDLEPIS-YDPKFEKQLGQVMLLVLCAGQLLLMRTTWAFCEV  |
| ZIKV      | MMGCGYQLTPTLTLIVAILLVLAHYMYLIPGLQAAAAAQAQRRTAAGIMKNPVDGIVTVDIDTMT-IDPQVEKKGQVLLIAYAISSAVLLRTAWGWGEA      |
| YFV       | LVSQWNSITVMPLLCGIGCAMLHWSLILPGIKAAQSKLAQRRTFHGVAKNPVDGNPTVDIEEAPEMPALYEKKLALYLLALLSLASVAMC RTPFSLAEG     |

|           |                                                             |
|-----------|-------------------------------------------------------------|
| Ruler 1   | 210 220 230 240 250                                         |
| Consensus | gxLaTaAixTLWEGnpgkxWNxTiAVSmcni xRGSYLAGaxlaxtliKNxxxpxr--  |
| ILHV      | GVLTTSAMATLIEGNANTVWNSTVAVGVCHLMRGAWLAGPSIGWTIVRNLENP KLKR  |
| ROCV      | GVLITAAATLTLLEGNANTVWNSTVAVGVCHLMRGGWAAGPSIGWTIIRNLEAPKVKR  |
| WNV       | GILITAAAVTLWENGASVWNATTAIGLCHIMRGGWLSCLSIWTTLIKNMEKPG LKR   |
| JEV       | GVLVTAATLTLWDNGASAVWNSTTATGLCHVMRGSYLAGGSAWTLIKNADKPS LKR   |
| DENV1     | ITLATGPLTTLWEGSPGKFWNNTTIAVSMANIFRGSYLAGAGLAFSLMKSLGGRR--   |
| DENV2     | LTLATGPIITLWEGNPGRFWNNTTIAVSMANIFRGSYLAGAGLLFSIMKNTNTNTR--  |
| DENV3     | LTLATGPIITLWEGSPGKFWNNTTIAVSMANIFRGSYLAGAGLAFSIMKS VGTGR--  |
| DENV4     | LTLATGPVLTLWEGNPGRFWNNTTIAVSTANIFRGSYLAGAGLAFSLIKNAQT PRR-- |
| ZIKV      | GALITAAATSLWEGSPKNKYNSSTATSLCNIFRGSYLAGASLIVTVTRNAGLVKRR-   |
| YFV       | IVLASAALGPLIEGNTSLWNGPMASMTGVMRGNYAFVGVMYNLWKMKTGR--        |

**Supplementary Figure S2: Alignment of Individual Proteins Across Multiple Flaviviruses.** Individual proteins from representative flaviviruses were aligned using the Clustal Omega algorithm in MegAlign Pro v17.2.1 (DNASTAR, Madison, WI). Amino acids are colored by side chain chemistry: aromatic residues (F, W, and Y) are yellow, acidic residues (D and E) are red, basic residues (R, H, and K) are blue, nonpolar residues (A, G, I, L, M, P, and V) are orange, and polar residues (C, N, Q, S, and T) are green. Gaps are represented as dashes. Black rectangles designate cysteine residues predicted to form disulfide bridges.

# NS5

|           |                                                                                                                                                                                                                                                                                                                                                                                                                                                                                                                                           |
|-----------|-------------------------------------------------------------------------------------------------------------------------------------------------------------------------------------------------------------------------------------------------------------------------------------------------------------------------------------------------------------------------------------------------------------------------------------------------------------------------------------------------------------------------------------------|
| Ruler 1   |                                                                                                                                                                                                                                                                                                                                                                                                                                                                                                                                           |
| Consensus | 1102030405060708090<br>-GGa <b>x</b> Ge <b>T</b> L <b>G</b> E <b>k</b> W <b>K</b> r <b>r</b> LN <b>Q</b> L <b>s</b> re <b>E</b> F <b>x</b> <b>x</b> Y <b>K</b> <b>x</b> s <b>G</b> I <b>i</b> EV <b>D</b> RT <b>E</b> A <b>x</b> r <b>A</b> I <b>K</b> e <b>G</b> <b>x</b> <b>x</b> t <b>g</b> G <b>H</b> AV <b>S</b> R <b>G</b> <b>x</b> AK <b>L</b> R <b>W</b> <b>x</b> VE <b>R</b> GF <b>v</b> k <b>P</b> e <b>G</b> K <b>V</b> <b>x</b> DL <b>G</b> CG <b>R</b> GG <b>W</b> S <b>Y</b> Y <b>c</b> AT <b>L</b> K <b>k</b> v <b>Q</b> E |
| ILHV      | -GGGS <b>A</b> PT <b>L</b> GE <b>I</b> W <b>K</b> AQ <b>L</b> N <b>Q</b> LT <b>R</b> EE <b>F</b> MA <b>Y</b> RR <b>D</b> GI <b>E</b> VD <b>R</b> T <b>Q</b> ARR <b>A</b> R <b>R</b> Q <b>S</b> GI <b>T</b> GG <b>H</b> P <b>V</b> S <b>R</b> GT <b>A</b> KL <b>R</b> WM <b>V</b> ER <b>G</b> F <b>V</b> RP <b>I</b> GV <b>K</b> VD <b>L</b> GC <b>G</b> RG <b>G</b> W <b>S</b> Y <b>Y</b> CA <b>T</b> L <b>R</b> H <b>V</b> Q <b>E</b>                                                                                                    |
| ROCV      | -GG <b>I</b> A <b>A</b> PT <b>L</b> GE <b>I</b> W <b>K</b> S <b>R</b> LN <b>Q</b> LT <b>R</b> EQ <b>F</b> ME <b>Y</b> R <b>K</b> DG <b>I</b> IE <b>V</b> DR <b>T</b> A <b>A</b> RR <b>A</b> RR <b>R</b> EG <b>N</b> RT <b>GG</b> HP <b>V</b> S <b>R</b> GT <b>A</b> KL <b>R</b> WL <b>V</b> ER <b>G</b> F <b>V</b> PL <b>G</b> K <b>V</b> VD <b>L</b> GC <b>G</b> RG <b>G</b> W <b>S</b> Y <b>Y</b> CA <b>T</b> L <b>R</b> H <b>V</b> Q <b>E</b>                                                                                          |
| WNV       | -GG <b>A</b> K <b>R</b> TL <b>G</b> EV <b>W</b> K <b>E</b> R <b>L</b> N <b>Q</b> MT <b>K</b> EE <b>F</b> TR <b>Y</b> R <b>K</b> EA <b>I</b> IE <b>V</b> DR <b>S</b> AA <b>K</b> H <b>A</b> R <b>K</b> EG <b>N</b> VT <b>GG</b> HP <b>V</b> S <b>R</b> GT <b>A</b> KL <b>R</b> WL <b>V</b> ER <b>R</b> FL <b>E</b> P <b>V</b> G <b>K</b> VD <b>L</b> GC <b>G</b> RG <b>G</b> W <b>C</b> Y <b>M</b> AT <b>Q</b> K <b>R</b> V <b>Q</b> E                                                                                                     |
| JEV       | -GR <b>PG</b> GR <b>T</b> L <b>G</b> E <b>K</b> W <b>K</b> EL <b>N</b> AM <b>S</b> RE <b>E</b> F <b>F</b> K <b>Y</b> R <b>R</b> EA <b>I</b> IE <b>V</b> DR <b>T</b> E <b>A</b> RR <b>A</b> RR <b>E</b> NN <b>I</b> VGG <b>H</b> P <b>V</b> S <b>R</b> GS <b>A</b> KL <b>R</b> WL <b>V</b> E <b>K</b> G <b>V</b> SP <b>I</b> GV <b>K</b> VD <b>L</b> GC <b>G</b> RG <b>G</b> W <b>S</b> Y <b>Y</b> AA <b>T</b> L <b>K</b> K <b>V</b> Q <b>E</b>                                                                                            |
| DENV1     | GT <b>G</b> AG <b>Q</b> ET <b>L</b> GE <b>K</b> W <b>K</b> R <b>Q</b> LN <b>Q</b> L <b>S</b> K <b>S</b> E <b>F</b> NT <b>Y</b> K <b>R</b> SG <b>I</b> IE <b>V</b> DR <b>S</b> E <b>A</b> KE <b>G</b> L <b>K</b> RGE <b>P</b> -TK <b>H</b> AV <b>S</b> RGT <b>A</b> KL <b>R</b> WF <b>V</b> ER <b>N</b> L <b>V</b> PE <b>G</b> K <b>V</b> ID <b>L</b> GC <b>G</b> RG <b>G</b> W <b>S</b> Y <b>Y</b> CA <b>G</b> L <b>K</b> K <b>V</b> T <b>E</b>                                                                                           |
| DENV2     | GT <b>G</b> NI <b>IG</b> ET <b>L</b> GE <b>K</b> W <b>K</b> S <b>R</b> N <b>A</b> L <b>G</b> K <b>S</b> E <b>F</b> Q <b>I</b> Y <b>K</b> K <b>S</b> G <b>I</b> Q <b>E</b> VD <b>R</b> T <b>L</b> A <b>K</b> E <b>G</b> I <b>K</b> RGE <b>T</b> -DH <b>H</b> AV <b>S</b> RGS <b>A</b> KL <b>R</b> WF <b>V</b> ER <b>N</b> MT <b>P</b> EG <b>K</b> VVD <b>L</b> GC <b>G</b> RG <b>G</b> W <b>S</b> Y <b>Y</b> CG <b>L</b> K <b>N</b> V <b>R</b> E                                                                                           |
| DENV3     | GT <b>G</b> SG <b>Q</b> ET <b>L</b> GE <b>K</b> W <b>K</b> KL <b>N</b> Q <b>L</b> S <b>R</b> KE <b>F</b> DL <b>Y</b> K <b>K</b> SG <b>I</b> TE <b>V</b> DR <b>T</b> E <b>A</b> KE <b>G</b> L <b>K</b> RGE <b>I</b> -TH <b>H</b> AV <b>S</b> RGS <b>A</b> KL <b>Q</b> W <b>F</b> VER <b>N</b> MT <b>P</b> EG <b>R</b> V <b>I</b> D <b>L</b> GC <b>G</b> RG <b>G</b> W <b>S</b> Y <b>Y</b> CA <b>G</b> L <b>K</b> K <b>V</b> T <b>E</b>                                                                                                     |
| DENV4     | GT <b>G</b> TT <b>G</b> ET <b>L</b> GE <b>K</b> W <b>K</b> R <b>S</b> NS <b>L</b> DR <b>K</b> E <b>F</b> E <b>E</b> Y <b>K</b> R <b>S</b> G <b>I</b> LE <b>V</b> DR <b>T</b> E <b>A</b> K <b>S</b> AL <b>K</b> DG <b>S</b> K- <b>I</b> K <b>H</b> AV <b>S</b> RGS <b>S</b> K <b>I</b> R <b>W</b> I <b>V</b> ER <b>G</b> MT <b>P</b> K <b>G</b> K <b>V</b> VD <b>L</b> GC <b>G</b> RG <b>G</b> W <b>S</b> Y <b>Y</b> MA <b>T</b> L <b>K</b> N <b>V</b> T <b>E</b>                                                                          |
| ZIKV      | -GGG <b>T</b> GET <b>L</b> GE <b>K</b> W <b>K</b> AR <b>L</b> N <b>Q</b> MS <b>A</b> LE <b>F</b> Y <b>S</b> Y <b>K</b> K <b>S</b> G <b>I</b> TE <b>V</b> CR <b>E</b> EA <b>R</b> RL <b>K</b> DG <b>V</b> AT <b>GG</b> H <b>A</b> V <b>S</b> RGS <b>A</b> KL <b>R</b> WL <b>V</b> ER <b>G</b> YL <b>Q</b> P <b>Y</b> G <b>K</b> VVD <b>L</b> GC <b>G</b> RG <b>G</b> W <b>S</b> Y <b>Y</b> AA <b>T</b> I <b>R</b> K <b>V</b> Q <b>E</b>                                                                                                    |
| YFV       | -GS <b>AN</b> G <b>K</b> TL <b>G</b> EV <b>W</b> K <b>R</b> EL <b>N</b> LL <b>D</b> K <b>Q</b> Q <b>F</b> EL <b>Y</b> K <b>R</b> TD <b>I</b> VE <b>V</b> DR <b>T</b> A <b>RR</b> HL <b>A</b> EG <b>V</b> DT <b>G</b> V <b>A</b> V <b>S</b> RGT <b>A</b> KL <b>R</b> WF <b>H</b> ER <b>G</b> V <b>V</b> K <b>L</b> E <b>G</b> R <b>V</b> ID <b>L</b> GC <b>G</b> RG <b>G</b> W <b>C</b> Y <b>Y</b> AA <b>A</b> Q <b>K</b> E <b>V</b> S <b>G</b>                                                                                            |

|           |                                                                                                                                                                                                                                                                                                                                                                                                                                                                                                                                                       |
|-----------|-------------------------------------------------------------------------------------------------------------------------------------------------------------------------------------------------------------------------------------------------------------------------------------------------------------------------------------------------------------------------------------------------------------------------------------------------------------------------------------------------------------------------------------------------------|
| Ruler 1   |                                                                                                                                                                                                                                                                                                                                                                                                                                                                                                                                                       |
| Consensus | 110120130140150160170180190<br>V <b>R</b> G <b>Y</b> T <b>K</b> GG <b>P</b> G <b>H</b> EE <b>P</b> mx <b>M</b> Q <b>S</b> Y <b>G</b> W <b>N</b> I <b>V</b> <b>x</b> L <b>S</b> G <b>V</b> D <b>V</b> F <b>Y</b> k <b>P</b> p <b>E</b> k <b>C</b> D <b>T</b> LL <b>C</b> D <b>I</b> GE <b>S</b> S <b>x</b> S <b>P</b> t <b>V</b> E <b>E</b> g <b>R</b> TL <b>R</b> VL <b>x</b> M <b>V</b> E <b>P</b> WL <b>r</b> -gp <b>n</b> q <b>F</b> C <b>I</b> K <b>V</b> L <b>c</b> P <b>Y</b> M <b>P</b> k <b>V</b> i <b>E</b> k <b>L</b> e <b>R</b> L <b>Q</b> |
| ILHV      | V <b>R</b> G <b>Y</b> T <b>K</b> GG <b>P</b> G <b>H</b> EE <b>P</b> VM <b>M</b> Q <b>S</b> Y <b>G</b> W <b>N</b> I <b>V</b> TM <b>K</b> S <b>G</b> VD <b>V</b> F <b>Y</b> K <b>P</b> T <b>E</b> SC <b>D</b> TLL <b>C</b> D <b>I</b> GE <b>S</b> S <b>S</b> V <b>G</b> VE <b>A</b> ART <b>L</b> R <b>V</b> LD <b>M</b> VE <b>P</b> WL <b>R</b> -A <b>A</b> NS <b>F</b> C <b>I</b> K <b>V</b> L <b>C</b> P <b>Y</b> T <b>P</b> K <b>V</b> i <b>E</b> R <b>L</b> ER <b>L</b> Q                                                                           |
| ROCV      | V <b>R</b> G <b>Y</b> T <b>K</b> GG <b>P</b> G <b>H</b> EE <b>P</b> ML <b>M</b> Q <b>S</b> Y <b>G</b> W <b>N</b> I <b>V</b> SM <b>K</b> S <b>G</b> ID <b>V</b> F <b>Y</b> R <b>P</b> TE <b>A</b> CD <b>T</b> VL <b>C</b> D <b>I</b> GE <b>S</b> SP <b>S</b> PG <b>VE</b> E <b>A</b> RT <b>L</b> R <b>V</b> LE <b>M</b> IE <b>P</b> WL <b>R</b> -TA <b>N</b> Q <b>Y</b> CV <b>K</b> VL <b>C</b> P <b>Y</b> T <b>P</b> K <b>V</b> i <b>E</b> R <b>L</b> E <b>K</b> L <b>Q</b>                                                                           |
| WNV       | V <b>R</b> G <b>Y</b> T <b>K</b> GG <b>P</b> G <b>H</b> EE <b>P</b> QL <b>V</b> Q <b>S</b> Y <b>G</b> W <b>N</b> I <b>V</b> TM <b>K</b> S <b>G</b> VD <b>V</b> F <b>Y</b> R <b>P</b> SE <b>C</b> CD <b>T</b> LL <b>C</b> D <b>I</b> GE <b>S</b> SS <b>A</b> EE <b>H</b> RT <b>I</b> R <b>V</b> LE <b>M</b> VE <b>D</b> WL <b>H</b> R <b>G</b> P <b>R</b> E <b>F</b> CV <b>K</b> VL <b>C</b> P <b>Y</b> M <b>P</b> K <b>V</b> i <b>E</b> K <b>M</b> EL <b>L</b> Q                                                                                      |
| JEV       | V <b>R</b> G <b>Y</b> T <b>K</b> GG <b>A</b> G <b>H</b> EE <b>P</b> ML <b>M</b> Q <b>S</b> Y <b>G</b> W <b>N</b> LV <b>S</b> L <b>K</b> S <b>G</b> VD <b>V</b> F <b>Y</b> K <b>P</b> SE <b>P</b> SD <b>T</b> LC <b>D</b> IGE <b>S</b> SP <b>S</b> PE <b>VE</b> EQ <b>R</b> T <b>L</b> R <b>V</b> LE <b>M</b> TS <b>D</b> WL <b>H</b> R <b>G</b> P <b>R</b> E <b>F</b> C <b>I</b> K <b>V</b> L <b>C</b> P <b>Y</b> M <b>P</b> K <b>V</b> i <b>E</b> K <b>M</b> EA <b>V</b> L <b>Q</b>                                                                  |
| DENV1     | V <b>K</b> G <b>Y</b> T <b>K</b> GG <b>P</b> G <b>H</b> EE <b>P</b> IM <b>A</b> TY <b>G</b> W <b>N</b> LV <b>K</b> LY <b>S</b> G <b>D</b> V <b>F</b> FT <b>P</b> PE <b>K</b> CD <b>T</b> LL <b>C</b> D <b>I</b> GE <b>S</b> SP <b>N</b> PT <b>I</b> EE <b>G</b> RT <b>L</b> R <b>V</b> L <b>K</b> M <b>V</b> EP <b>W</b> LR <b>-G</b> -NQ <b>F</b> C <b>I</b> K <b>I</b> L <b>N</b> P <b>Y</b> M <b>S</b> SV <b>V</b> ET <b>L</b> EQ <b>M</b>                                                                                                         |
| DENV2     | V <b>K</b> GL <b>T</b> K <b>G</b> GG <b>P</b> G <b>H</b> EE <b>P</b> IP <b>M</b> ST <b>Y</b> GW <b>N</b> LV <b>R</b> L <b>Q</b> S <b>G</b> VD <b>V</b> F <b>FT</b> P <b>PE</b> K <b>CD</b> TLL <b>C</b> D <b>I</b> GE <b>S</b> SP <b>N</b> TY <b>E</b> AG <b>R</b> T <b>L</b> R <b>V</b> LN <b>L</b> VEN <b>W</b> L <b>-N</b> NT <b>F</b> C <b>I</b> K <b>V</b> L <b>N</b> P <b>Y</b> M <b>S</b> SV <b>I</b> E <b>K</b> ME <b>A</b> V <b>L</b> Q                                                                                                      |
| DENV3     | V <b>R</b> G <b>Y</b> T <b>K</b> GG <b>P</b> G <b>H</b> EE <b>P</b> VP <b>M</b> ST <b>Y</b> GW <b>N</b> I <b>V</b> K <b>L</b> MS <b>G</b> K <b>D</b> V <b>F</b> YL <b>P</b> PE <b>K</b> CD <b>T</b> LL <b>C</b> D <b>I</b> GE <b>S</b> SP <b>S</b> PT <b>VE</b> ES <b>R</b> T <b>I</b> R <b>V</b> L <b>K</b> M <b>V</b> EP <b>W</b> LR <b>-N</b> -NQ <b>F</b> C <b>I</b> K <b>V</b> L <b>N</b> P <b>Y</b> M <b>P</b> TV <b>I</b> E <b>H</b> ER <b>L</b> L <b>Q</b>                                                                                    |
| DENV4     | V <b>K</b> G <b>Y</b> T <b>K</b> GG <b>P</b> G <b>H</b> EE <b>P</b> IM <b>A</b> TY <b>G</b> W <b>N</b> LV <b>K</b> L <b>H</b> S <b>G</b> VD <b>V</b> F <b>Y</b> K <b>P</b> TE <b>Q</b> VD <b>T</b> LL <b>C</b> D <b>I</b> GE <b>S</b> SS <b>N</b> PT <b>I</b> EE <b>G</b> RT <b>L</b> R <b>V</b> L <b>K</b> M <b>V</b> EP <b>W</b> LS <b>-S</b> K <b>P</b> E <b>F</b> C <b>I</b> K <b>V</b> L <b>N</b> P <b>Y</b> M <b>P</b> TV <b>I</b> EE <b>L</b> E <b>K</b> L <b>Q</b>                                                                            |
| ZIKV      | V <b>R</b> G <b>Y</b> T <b>K</b> GG <b>P</b> G <b>H</b> EE <b>P</b> ML <b>V</b> Q <b>S</b> Y <b>G</b> W <b>N</b> I <b>V</b> R <b>L</b> K <b>S</b> G <b>VD</b> V <b>F</b> H <b>M</b> AA <b>E</b> P <b>Q</b> CD <b>T</b> LL <b>C</b> D <b>I</b> GE <b>S</b> SS <b>PE</b> VE <b>ET</b> RT <b>L</b> R <b>V</b> L <b>S</b> M <b>V</b> GD <b>W</b> LE <b>K</b> P <b>G</b> AF <b>C</b> I <b>K</b> VL <b>C</b> P <b>Y</b> T <b>S</b> TM <b>M</b> ET <b>M</b> ER <b>L</b> Q                                                                                    |
| YFV       | V <b>K</b> G <b>F</b> TL <b>G</b> RD <b>G</b> H <b>E</b> K <b>P</b> M <b>N</b> V <b>Q</b> SL <b>G</b> W <b>N</b> I <b>I</b> TF <b>K</b> D <b>K</b> TD <b>I</b> HR <b>L</b> EP <b>V</b> K <b>CD</b> TLL <b>C</b> D <b>I</b> GE <b>S</b> SS <b>S</b> SV <b>T</b> EG <b>E</b> RT <b>V</b> R <b>V</b> LD <b>T</b> VE <b>K</b> WL <b>AC</b> G <b>V</b> D <b>N</b> F <b>CV</b> K <b>V</b> L <b>A</b> P <b>Y</b> M <b>P</b> D <b>V</b> L <b>E</b> K <b>L</b> EL <b>L</b> Q                                                                                   |

|           |                                                                                                                                                                                                                                                                                                                                                                                                                                                                                                                                                   |
|-----------|---------------------------------------------------------------------------------------------------------------------------------------------------------------------------------------------------------------------------------------------------------------------------------------------------------------------------------------------------------------------------------------------------------------------------------------------------------------------------------------------------------------------------------------------------|
| Ruler 1   |                                                                                                                                                                                                                                                                                                                                                                                                                                                                                                                                                   |
| Consensus | 210220230240250260270280290<br>R <b>k</b> <b>x</b> GG <b>G</b> L <b>V</b> R <b>n</b> PL <b>S</b> R <b>N</b> ST <b>H</b> EM <b>Y</b> W <b>V</b> VS <b>G</b> a <b>S</b> GN <b>I</b> V <b>s</b> V <b>N</b> m <b>T</b> S <b>q</b> <b>x</b> LL <b>n</b> R <b>m</b> t <b>x</b> r <b>h</b> -r <b>x</b> P <b>t</b> Y <b>E</b> e <b>D</b> V <b>D</b> LG <b>S</b> GT <b>R</b> a <b>V</b> et <b>e</b> x <b>p</b> p <b>x</b> m <b>d</b> <b>x</b> l <b>g</b> <b>x</b> R <b>I</b> E <b>R</b> <b>x</b> K <b>e</b> H <b>s</b> t <b>T</b> W <b>H</b> Y <b>D</b> ee |
| ILHV      | RA <b>Y</b> GG <b>G</b> L <b>V</b> R <b>V</b> PL <b>S</b> R <b>N</b> ST <b>H</b> EM <b>Y</b> W <b>V</b> VS <b>G</b> ASS <b>N</b> I <b>N</b> AV <b>T</b> VT <b>S</b> Q <b>I</b> L <b>V</b> QR <b>M</b> N <b>K</b> CG <b>R</b> H <b>G</b> PR <b>Y</b> EE <b>D</b> VC <b>L</b> GS <b>G</b> TR <b>A</b> VA <b>T</b> Q <b>A</b> SP <b>S</b> D <b>H</b> T <b>K</b> I <b>K</b> HR <b>L</b> ER <b>L</b> R <b>K</b> E <b>F</b> SA <b>T</b> W <b>H</b> I <b>D</b> LE                                                                                        |
| ROCV      | R <b>K</b> YGG <b>G</b> L <b>V</b> R <b>V</b> PL <b>S</b> R <b>N</b> SN <b>H</b> EM <b>Y</b> W <b>V</b> VS <b>E</b> ASS <b>N</b> L <b>I</b> NAV <b>N</b> AT <b>S</b> Q <b>V</b> LL <b>Q</b> RL <b>E</b> K <b>D</b> HR <b>K</b> GP <b>R</b> YEE <b>D</b> V <b>D</b> LG <b>S</b> GT <b>R</b> SV <b>A</b> RR <b>S</b> PF <b>M</b> DT <b>R</b> K <b>I</b> HH <b>R</b> IE <b>R</b> L <b>K</b> S <b>E</b> FS <b>T</b> TW <b>H</b> Y <b>D</b> CE                                                                                                         |
| WNV       | RR <b>Y</b> GG <b>G</b> L <b>V</b> R <b>N</b> PL <b>S</b> R <b>N</b> ST <b>H</b> EM <b>Y</b> W <b>V</b> VS <b>G</b> AG <b>N</b> V <b>H</b> S <b>V</b> NMT <b>S</b> Q <b>V</b> LL <b>G</b> RM <b>K</b> RT <b>W</b> K <b>G</b> P <b>Q</b> YEE <b>D</b> N <b>L</b> GS <b>G</b> TR <b>A</b> VG <b>K</b> PL <b>N</b> SD <b>S</b> T <b>S</b> K <b>I</b> K <b>N</b> RI <b>E</b> RL <b>R</b> K <b>E</b> YS <b>T</b> W <b>H</b> HD <b>E</b>                                                                                                                |
| JEV       | RR <b>F</b> GG <b>G</b> L <b>V</b> RL <b>L</b> PL <b>S</b> R <b>N</b> SN <b>H</b> EM <b>Y</b> W <b>V</b> VS <b>G</b> AA <b>G</b> N <b>V</b> HAV <b>N</b> MT <b>S</b> Q <b>V</b> LL <b>G</b> R <b>M</b> DT <b>Y</b> W <b>R</b> GP <b>K</b> YEE <b>D</b> N <b>L</b> GS <b>G</b> TR <b>A</b> VG <b>K</b> VE <b>S</b> N <b>O</b> E <b>K</b> I <b>K</b> RI <b>Q</b> L <b>K</b> EE <b>F</b> AT <b>T</b> W <b>H</b> K <b>D</b> PE                                                                                                                        |
| DENV1     | R <b>K</b> HGG <b>M</b> L <b>V</b> R <b>N</b> PL <b>S</b> R <b>N</b> ST <b>H</b> EM <b>Y</b> W <b>V</b> SC <b>G</b> T <b>G</b> N <b>I</b> VS <b>A</b> V <b>N</b> MT <b>S</b> R <b>M</b> L <b>N</b> RF <b>T</b> MA <b>H</b> -R <b>K</b> P <b>T</b> YER <b>D</b> VD <b>L</b> G <b>A</b> GT <b>R</b> H <b>V</b> AVE <b>P</b> E <b>V</b> AN <b>L</b> D <b>I</b> IG <b>Q</b> R <b>I</b> EN <b>I</b> K <b>N</b> G <b>H</b> K <b>S</b> T <b>W</b> H <b>Y</b> D <b>E</b> D                                                                                |
| DENV2     | R <b>K</b> YGG <b>A</b> L <b>V</b> R <b>N</b> PL <b>S</b> R <b>N</b> ST <b>H</b> EM <b>Y</b> W <b>V</b> VS <b>N</b> AS <b>G</b> N <b>I</b> VS <b>S</b> V <b>N</b> M <b>I</b> S <b>R</b> ML <b>N</b> RF <b>T</b> MR <b>H</b> -K <b>K</b> AT <b>Y</b> EP <b>D</b> VD <b>L</b> GS <b>G</b> TR <b>N</b> I <b>G</b> IE <b>S</b> I <b>P</b> N <b>L</b> D <b>I</b> IG <b>K</b> R <b>I</b> E <b>K</b> I <b>K</b> Q <b>E</b> H <b>S</b> T <b>W</b> H <b>Y</b> D <b>Q</b> D                                                                                 |
| DENV3     | R <b>K</b> HGG <b>M</b> L <b>V</b> R <b>N</b> PL <b>S</b> R <b>N</b> ST <b>H</b> EM <b>Y</b> W <b>I</b> Y <b>S</b> NG <b>T</b> GN <b>I</b> VS <b>S</b> V <b>N</b> M <b>V</b> S <b>R</b> LL <b>N</b> RF <b>T</b> MT <b>H</b> -RR <b>P</b> T <b>I</b> E <b>K</b> D <b>V</b> D <b>L</b> G <b>A</b> GT <b>R</b> H <b>V</b> NA <b>E</b> PT <b>P</b> N <b>M</b> D <b>V</b> I <b>G</b> ER <b>I</b> K <b>R</b> I <b>E</b> E <b>H</b> S <b>T</b> W <b>H</b> Y <b>D</b> DE                                                                                  |
| DENV4     | R <b>K</b> HGG <b>S</b> L <b>V</b> RC <b>P</b> L <b>S</b> R <b>N</b> ST <b>H</b> EM <b>Y</b> W <b>V</b> VS <b>G</b> VS <b>G</b> N <b>I</b> VS <b>S</b> V <b>N</b> T <b>S</b> K <b>M</b> L <b>N</b> RF <b>T</b> TR <b>H</b> -R <b>K</b> P <b>T</b> Y <b>E</b> K <b>D</b> VD <b>L</b> G <b>A</b> GT <b>R</b> SV <b>S</b> T <b>E</b> TE <b>K</b> PD <b>M</b> T <b>I</b> IG <b>R</b> RL <b>Q</b> RL <b>Q</b> E <b>H</b> E <b>K</b> T <b>W</b> H <b>Y</b> D <b>Q</b> E                                                                                 |
| ZIKV      | RR <b>H</b> GG <b>G</b> L <b>V</b> R <b>V</b> PL <b>S</b> R <b>N</b> ST <b>H</b> EM <b>Y</b> W <b>V</b> VS <b>L</b> V <b>N</b> G <b>V</b> RL <b>L</b> S <b>K</b> P <b>W</b> D <b>V</b> VT <b>G</b> VT <b>G</b> I <b>A</b> MT <b>D</b> TT <b>P</b> Y <b>G</b> Q <b>R</b> Y <b>F</b> KE <b>K</b> VD <b>T</b> R <b>V</b> PD <b>Q</b> EG <b>T</b> R <b>V</b> M <b>N</b> I <b>V</b> SS <b>W</b> LV <b>K</b> EL <b>G</b> K <b>R</b> K <b>R</b> PR <b>V</b> CT <b>K</b> E                                                                                |
| YFV       | RR <b>F</b> GG <b>T</b> V <b>I</b> R <b>N</b> PL <b>S</b> R <b>N</b> ST <b>H</b> EM <b>Y</b> W <b>V</b> VS <b>G</b> ARS <b>N</b> VT <b>F</b> T <b>V</b> N <b>Q</b> TS <b>R</b> LL <b>M</b> RR <b>M</b> RR <b>P</b> T-G <b>K</b> V <b>T</b> LE <b>A</b> D <b>V</b> IL <b>P</b> IG <b>T</b> RS <b>V</b> ET <b>D</b> K <b>G</b> PL <b>D</b> KE <b>A</b> IE <b>E</b> R <b>V</b> ER <b>I</b> K <b>S</b> E <b>Y</b> MT <b>S</b> W <b>F</b> Y <b>D</b> ND                                                                                                |

|           |                                                                                                                                                                                                                                                                                                                                                                                                                                                                                                                                   |
|-----------|-----------------------------------------------------------------------------------------------------------------------------------------------------------------------------------------------------------------------------------------------------------------------------------------------------------------------------------------------------------------------------------------------------------------------------------------------------------------------------------------------------------------------------------|
| Ruler 1   |                                                                                                                                                                                                                                                                                                                                                                                                                                                                                                                                   |
| Consensus | 310320330340350360370380390<br>H <b>P</b> Y <b>R</b> T <b>W</b> a <b>Y</b> H <b>G</b> S <b>Y</b> E <b>V</b> K <b>P</b> GS <b>A</b> SS <b>M</b> V <b>N</b> G <b>V</b> V <b>x</b> LL <b>x</b> K <b>P</b> WD <b>v</b> l <b>p</b> m <b>V</b> T <b>x</b> M <b>A</b> MT <b>D</b> TT <b>P</b> FG <b>Q</b> Q <b>R</b> V <b>F</b> KE <b>K</b> VD <b>T</b> R <b>a</b> Pe <b>P</b> <b>x</b> <b>x</b> GT <b>x</b> VM <b>n</b> i <b>T</b> <b>x</b> n <b>W</b> L <b>W</b> a <b>f</b> l <b>g</b> Re <b>K</b> r <b>P</b> r <b>X</b> CT <b>R</b> E |
| ILHV      | HP <b>Y</b> RT <b>W</b> HY <b>H</b> GS <b>Y</b> EQ <b>T</b> GS <b>A</b> NS <b>M</b> V <b>N</b> G <b>V</b> VR <b>L</b> LL <b>S</b> K <b>P</b> WD <b>A</b> I <b>T</b> SV <b>T</b> TM <b>A</b> MT <b>D</b> TT <b>P</b> FG <b>Q</b> Q <b>R</b> Y <b>F</b> KE <b>K</b> VD <b>T</b> RA <b>P</b> D <b>P</b> AV <b>G</b> YA <b>Q</b> AL <b>D</b> IT <b>T</b> GW <b>L</b> W <b>T</b> FL <b>A</b> RS <b>K</b> K <b>P</b> RM <b>CT</b> RE                                                                                                    |
| ROCV      | HP <b>Y</b> RT <b>W</b> NY <b>H</b> GS <b>Y</b> EV <b>K</b> PT <b>G</b> S <b>A</b> SS <b>M</b> V <b>N</b> G <b>V</b> V <b>K</b> LS <b>K</b> PWD <b>S</b> I <b>Q</b> SV <b>L</b> TM <b>A</b> MT <b>D</b> TT <b>P</b> FG <b>Q</b> Q <b>R</b> Y <b>F</b> KE <b>K</b> VD <b>T</b> KA <b>P</b> E <b>P</b> AP <b>G</b> V <b>K</b> VLD <b>L</b> TT <b>D</b> WL <b>V</b> AL <b>C</b> RR <b>S</b> K <b>K</b> P <b>RM</b> CT <b>K</b> E                                                                                                     |
| WNV       | HP <b>Y</b> RT <b>W</b> NY <b>H</b> GS <b>Y</b> D <b>V</b> K <b>P</b> T <b>G</b> S <b>A</b> SS <b>L</b> V <b>N</b> G <b>V</b> VR <b>L</b> LL <b>S</b> K <b>P</b> WD <b>T</b> I <b>T</b> N <b>V</b> TT <b>A</b> MT <b>D</b> TT <b>P</b> FG <b>Q</b> Q <b>R</b> Y <b>F</b> KE <b>K</b> VD <b>T</b> KA <b>P</b> EP <b>P</b> EG <b>V</b> K <b>V</b> VL <b>N</b> ET <b>T</b> N <b>W</b> L <b>W</b> A <b>F</b> L <b>A</b> RE <b>K</b> R <b>P</b> MC <b>S</b> RE                                                                         |
| JEV       | HP <b>Y</b> RT <b>W</b> T <b>Y</b> HGS <b>Y</b> EV <b>K</b> AT <b>G</b> S <b>A</b> SS <b>L</b> V <b>N</b> G <b>V</b> V <b>K</b> LS <b>K</b> PWD <b>A</b> I <b>A</b> NY <b>T</b> TM <b>A</b> MT <b>D</b> TT <b>P</b> FG <b>Q</b> Q <b>R</b> Y <b>F</b> KE <b>K</b> VD <b>T</b> KA <b>P</b> E <b>P</b> P <b>A</b> GA <b>K</b> EV <b>L</b> NET <b>T</b> N <b>W</b> L <b>W</b> A <b>H</b> LS <b>R</b> E <b>K</b> R <b>P</b> RL <b>CT</b> KE                                                                                           |
| DENV1     | HP <b>Y</b> K <b>T</b> W <b>A</b> Y <b>H</b> GS <b>Y</b> EV <b>K</b> PS <b>G</b> SA <b>S</b> SM <b>V</b> NG <b>V</b> VR <b>L</b> LT <b>K</b> PWD <b>V</b> I <b>P</b> MT <b>V</b> Q <b>I</b> AM <b>T</b> D <b>T</b> TP <b>F</b> G <b>Q</b> Q <b>R</b> Y <b>F</b> KE <b>K</b> VD <b>T</b> RT <b>P</b> KA <b>K</b> R <b>G</b> TA <b>Q</b> IME <b>V</b> TAR <b>W</b> L <b>G</b> W <b>F</b> LS <b>R</b> N <b>K</b> K <b>P</b> RI <b>CT</b> KE                                                                                          |
| DENV2     | HP <b>Y</b> K <b>T</b> W <b>A</b> Y <b>H</b> GS <b>Y</b> ET <b>K</b> QT <b>G</b> SA <b>S</b> SM <b>V</b> NG <b>V</b> VR <b>L</b> LT <b>K</b> PWD <b>V</b> VP <b>M</b> VT <b>Q</b> AM <b>T</b> D <b>T</b> TP <b>F</b> G <b>Q</b> Q <b>R</b> Y <b>F</b> KE <b>K</b> VD <b>T</b> RT <b>Q</b> EP <b>K</b> EG <b>T</b> K <b>K</b> LM <b>K</b> I <b>T</b> AE <b>W</b> LV <b>W</b> KL <b>G</b> K <b>K</b> KT <b>P</b> RM <b>CT</b> RE                                                                                                    |
| DENV3     | NP <b>Y</b> K <b>T</b> W <b>A</b> Y <b>H</b> GS <b>Y</b> EV <b>K</b> AT <b>G</b> S <b>A</b> SS <b>M</b> ING <b>V</b> VR <b>L</b> LT <b>K</b> PWD <b>V</b> VP <b>M</b> VT <b>Q</b> AM <b>T</b> D <b>T</b> TP <b>F</b> G <b>Q</b> Q <b>R</b> Y <b>F</b> KE <b>K</b> VD <b>T</b> TR <b>P</b> MP <b>GT</b> R <b>K</b> YME <b>I</b> TA <b>E</b> W <b>L</b> W <b>R</b> T <b>L</b> GR <b>N</b> K <b>R</b> PL <b>CT</b> RE                                                                                                                |
| DENV4     | NP <b>Y</b> RT <b>W</b> AY <b>H</b> GS <b>Y</b> E <b>A</b> PT <b>G</b> SA <b>S</b> SM <b>V</b> NG <b>V</b> VR <b>L</b> LT <b>K</b> PWD <b>V</b> I <b>P</b> MT <b>V</b> Q <b>I</b> AM <b>T</b> D <b>T</b> TP <b>F</b> G <b>Q</b> Q <b>R</b> Y <b>F</b> KE <b>K</b> VD <b>T</b> RT <b>P</b> Q <b>K</b> PG <b>T</b> RM <b>V</b> MT <b>T</b> T <b>A</b> N <b>W</b> L <b>W</b> AL <b>L</b> G <b>K</b> K <b>K</b> N <b>P</b> RL <b>CT</b> KE                                                                                            |
| ZIKV      | HP <b>Y</b> RT <b>W</b> AY <b>H</b> GS <b>Y</b> E <b>A</b> PT <b>G</b> SA <b>S</b> SM <b>V</b> NG <b>V</b> VR <b>L</b> LL <b>S</b> K <b>P</b> WD <b>V</b> VT <b>G</b> VT <b>G</b> I <b>A</b> MT <b>D</b> TT <b>P</b> Y <b>G</b> Q <b>R</b> Y <b>F</b> KE <b>K</b> VD <b>T</b> R <b>V</b> PD <b>Q</b> EG <b>T</b> R <b>V</b> M <b>N</b> I <b>V</b> SS <b>W</b> LV <b>K</b> EL <b>G</b> K <b>R</b> K <b>R</b> PR <b>V</b> CT <b>K</b> E                                                                                             |
| YFV       | NP <b>Y</b> RT <b>W</b> HY <b>C</b> S <b>Y</b> VT <b>K</b> TS <b>G</b> SA <b>A</b> SM <b>V</b> NG <b>V</b> I <b>K</b> ILT <b>P</b> Y <b>P</b> WD <b>R</b> I <b>EE</b> VT <b>R</b> MA <b>M</b> T <b>D</b> TT <b>P</b> FG <b>Q</b> Q <b>R</b> Y <b>F</b> KE <b>K</b> VD <b>T</b> RA <b>K</b> D <b>P</b> P <b>A</b> GT <b>R</b> K <b>I</b> M <b>K</b> V <b>V</b> N <b>R</b> W <b>L</b> F <b>R</b> HL <b>A</b> RE <b>K</b> N <b>P</b> RL <b>CT</b> KE                                                                                 |

|           |                                                                                                                                                                                                                                                                                                                                                                                                                                                                                                |
|-----------|------------------------------------------------------------------------------------------------------------------------------------------------------------------------------------------------------------------------------------------------------------------------------------------------------------------------------------------------------------------------------------------------------------------------------------------------------------------------------------------------|
| Ruler 1   |                                                                                                                                                                                                                                                                                                                                                                                                                                                                                                |
| Consensus | 410420430440450460470480490<br>E <b>F</b> I <b>x</b> K <b>V</b> RS <b>N</b> AA <b>L</b> GA <b>V</b> F <b>e</b> <b>x</b> EQ <b>W</b> KS <b>A</b> RE <b>A</b> Y <b>D</b> ED <b>r</b> F <b>W</b> e <b>L</b> VD <b>E</b> R <b>e</b> I <b>HL</b> <b>x</b> G <b>K</b> C <b>e</b> TC <b>V</b> Y <b>N</b> MM <b>G</b> K <b>R</b> E <b>K</b> KL <b>G</b> EF <b>G</b> KA <b>K</b> GS <b>R</b> A <b>I</b> W <b>Y</b> MW <b>L</b> GA <b>R</b> FL <b>E</b> F <b>E</b> AL <b>G</b> FL <b>N</b> ED <b>H</b> W |
| ILHV      | E <b>F</b> I <b>A</b> K <b>V</b> NS <b>N</b> AA <b>L</b> GA <b>V</b> FD <b>E</b> Q <b>N</b> Q <b>W</b> ST <b>A</b> RE <b>A</b> VED <b>P</b> AF <b>W</b> N <b>L</b> VD <b>E</b> ER <b>K</b> A <b>H</b> LAG <b>R</b> CE <b>T</b> C <b>I</b> Y <b>N</b> MM <b>G</b> K <b>R</b> E <b>K</b> KL <b>G</b> EF <b>G</b> KA <b>K</b> GS <b>R</b> A <b>I</b> W <b>Y</b> MW <b>L</b> GA <b>R</b> FL <b>E</b> F <b>E</b> AL <b>G</b> FL <b>N</b> ED <b>H</b> W                                              |
| ROCV      | E <b>F</b> I <b>A</b> K <b>V</b> NS <b>H</b> AA <b>L</b> GA <b>I</b> FE <b>E</b> Q <b>N</b> Q <b>W</b> AS <b>T</b> ARE <b>A</b> VED <b>P</b> GF <b>W</b> N <b>L</b> VD <b>K</b> ER <b>Q</b> A <b>H</b> L <b>E</b> GR <b>CE</b> T <b>C</b> I <b>Y</b> NN <b>M</b> G <b>K</b> R <b>E</b> KL <b>G</b> EF <b>G</b> KA <b>K</b> GS <b>R</b> A <b>I</b> W <b>Y</b> MW <b>L</b> GA <b>R</b> FL <b>E</b> F <b>E</b> AL <b>G</b> FL <b>N</b> ED <b>H</b> W                                              |
| WNV       | E <b>F</b> I <b>R</b> K <b>V</b> NS <b>N</b> AA <b>L</b> GA <b>MF</b> EE <b>Q</b> N <b>Q</b> W <b>S</b> ARE <b>A</b> Y <b>ED</b> PK <b>F</b> W <b>E</b> MV <b>D</b> EER <b>E</b> QA <b>H</b> LR <b>GE</b> CH <b>T</b> C <b>I</b> Y <b>NN</b> M <b>G</b> K <b>R</b> E <b>K</b> K <b>P</b> GE <b>F</b> G <b>K</b> A <b>K</b> GS <b>R</b> A <b>I</b> W <b>F</b> MW <b>L</b> GA <b>R</b> FL <b>E</b> F <b>E</b> AL <b>G</b> FL <b>N</b> ED <b>H</b> W                                              |
| JEV       | E <b>F</b> I <b>K</b> K <b>X</b> NS <b>N</b> AA <b>L</b> GA <b>FA</b> EE <b>Q</b> N <b>Q</b> W <b>S</b> TARE <b>A</b> Y <b>DD</b> PR <b>F</b> W <b>E</b> MV <b>D</b> EER <b>E</b> N <b>H</b> LR <b>GE</b> CH <b>T</b> C <b>I</b> Y <b>NN</b> M <b>G</b> K <b>R</b> E <b>K</b> K <b>P</b> GE <b>F</b> G <b>K</b> A <b>K</b> GS <b>R</b> A <b>I</b> W <b>F</b> MW <b>L</b> GA <b>R</b> FL <b>E</b> F <b>E</b> AL <b>G</b> FL <b>N</b> ED <b>H</b> W                                              |
| DENV1     | E <b>F</b> TR <b>K</b> V <b>S</b> NA <b>A</b> I <b>GA</b> V <b>F</b> DE <b>Q</b> N <b>Q</b> W <b>S</b> A <b>K</b> EA <b>N</b> I <b>D</b> RF <b>W</b> EL <b>V</b> HRE <b>R</b> EL <b>H</b> Q <b>G</b> K <b>C</b> AT <b>C</b> V <b>Y</b> NN <b>M</b> G <b>K</b> R <b>E</b> KL <b>G</b> EF <b>G</b> KA <b>K</b> GS <b>R</b> A <b>I</b> W <b>Y</b> MW <b>L</b> GA <b>R</b> FL <b>E</b> F <b>E</b> AL <b>G</b> FM <b>N</b> ED <b>H</b> W                                                            |
| DENV2     | E <b>F</b> TR <b>K</b> V <b>S</b> NA <b>A</b> AL <b>GA</b> I <b>F</b> TD <b>EN</b> K <b>W</b> KS <b>A</b> RE <b>A</b> Y <b>ED</b> S <b>R</b> F <b>W</b> EL <b>V</b> D <b>K</b> ERN <b>L</b> H <b>L</b> E <b>G</b> K <b>C</b> AT <b>C</b> V <b>Y</b> NN <b>M</b> G <b>K</b> R <b>E</b> KL <b>G</b> EF <b>G</b> KA <b>K</b> GS <b>R</b> A <b>I</b> W <b>Y</b> MW <b>L</b> GA <b>R</b> FL <b>E</b> F <b>E</b> AL <b>G</b> FL <b>N</b> ED <b>H</b> W                                               |
| DENV3     | E <b>F</b> TR <b>K</b> V <b>T</b> NA <b>A</b> MG <b>A</b> VF <b>T</b> EN <b>Q</b> W <b>S</b> ARE                                                                                                                                                                                                                                                                                                                                                                                               |
