# Supplementary figures and images for: Morphologic and Genetic Characterization of Ilheus Virus, a Potential Emergent Flavivirus in the Americas
Source: MDPI journal article supplement (doi:10.3390/v15010195), 2023-01-10

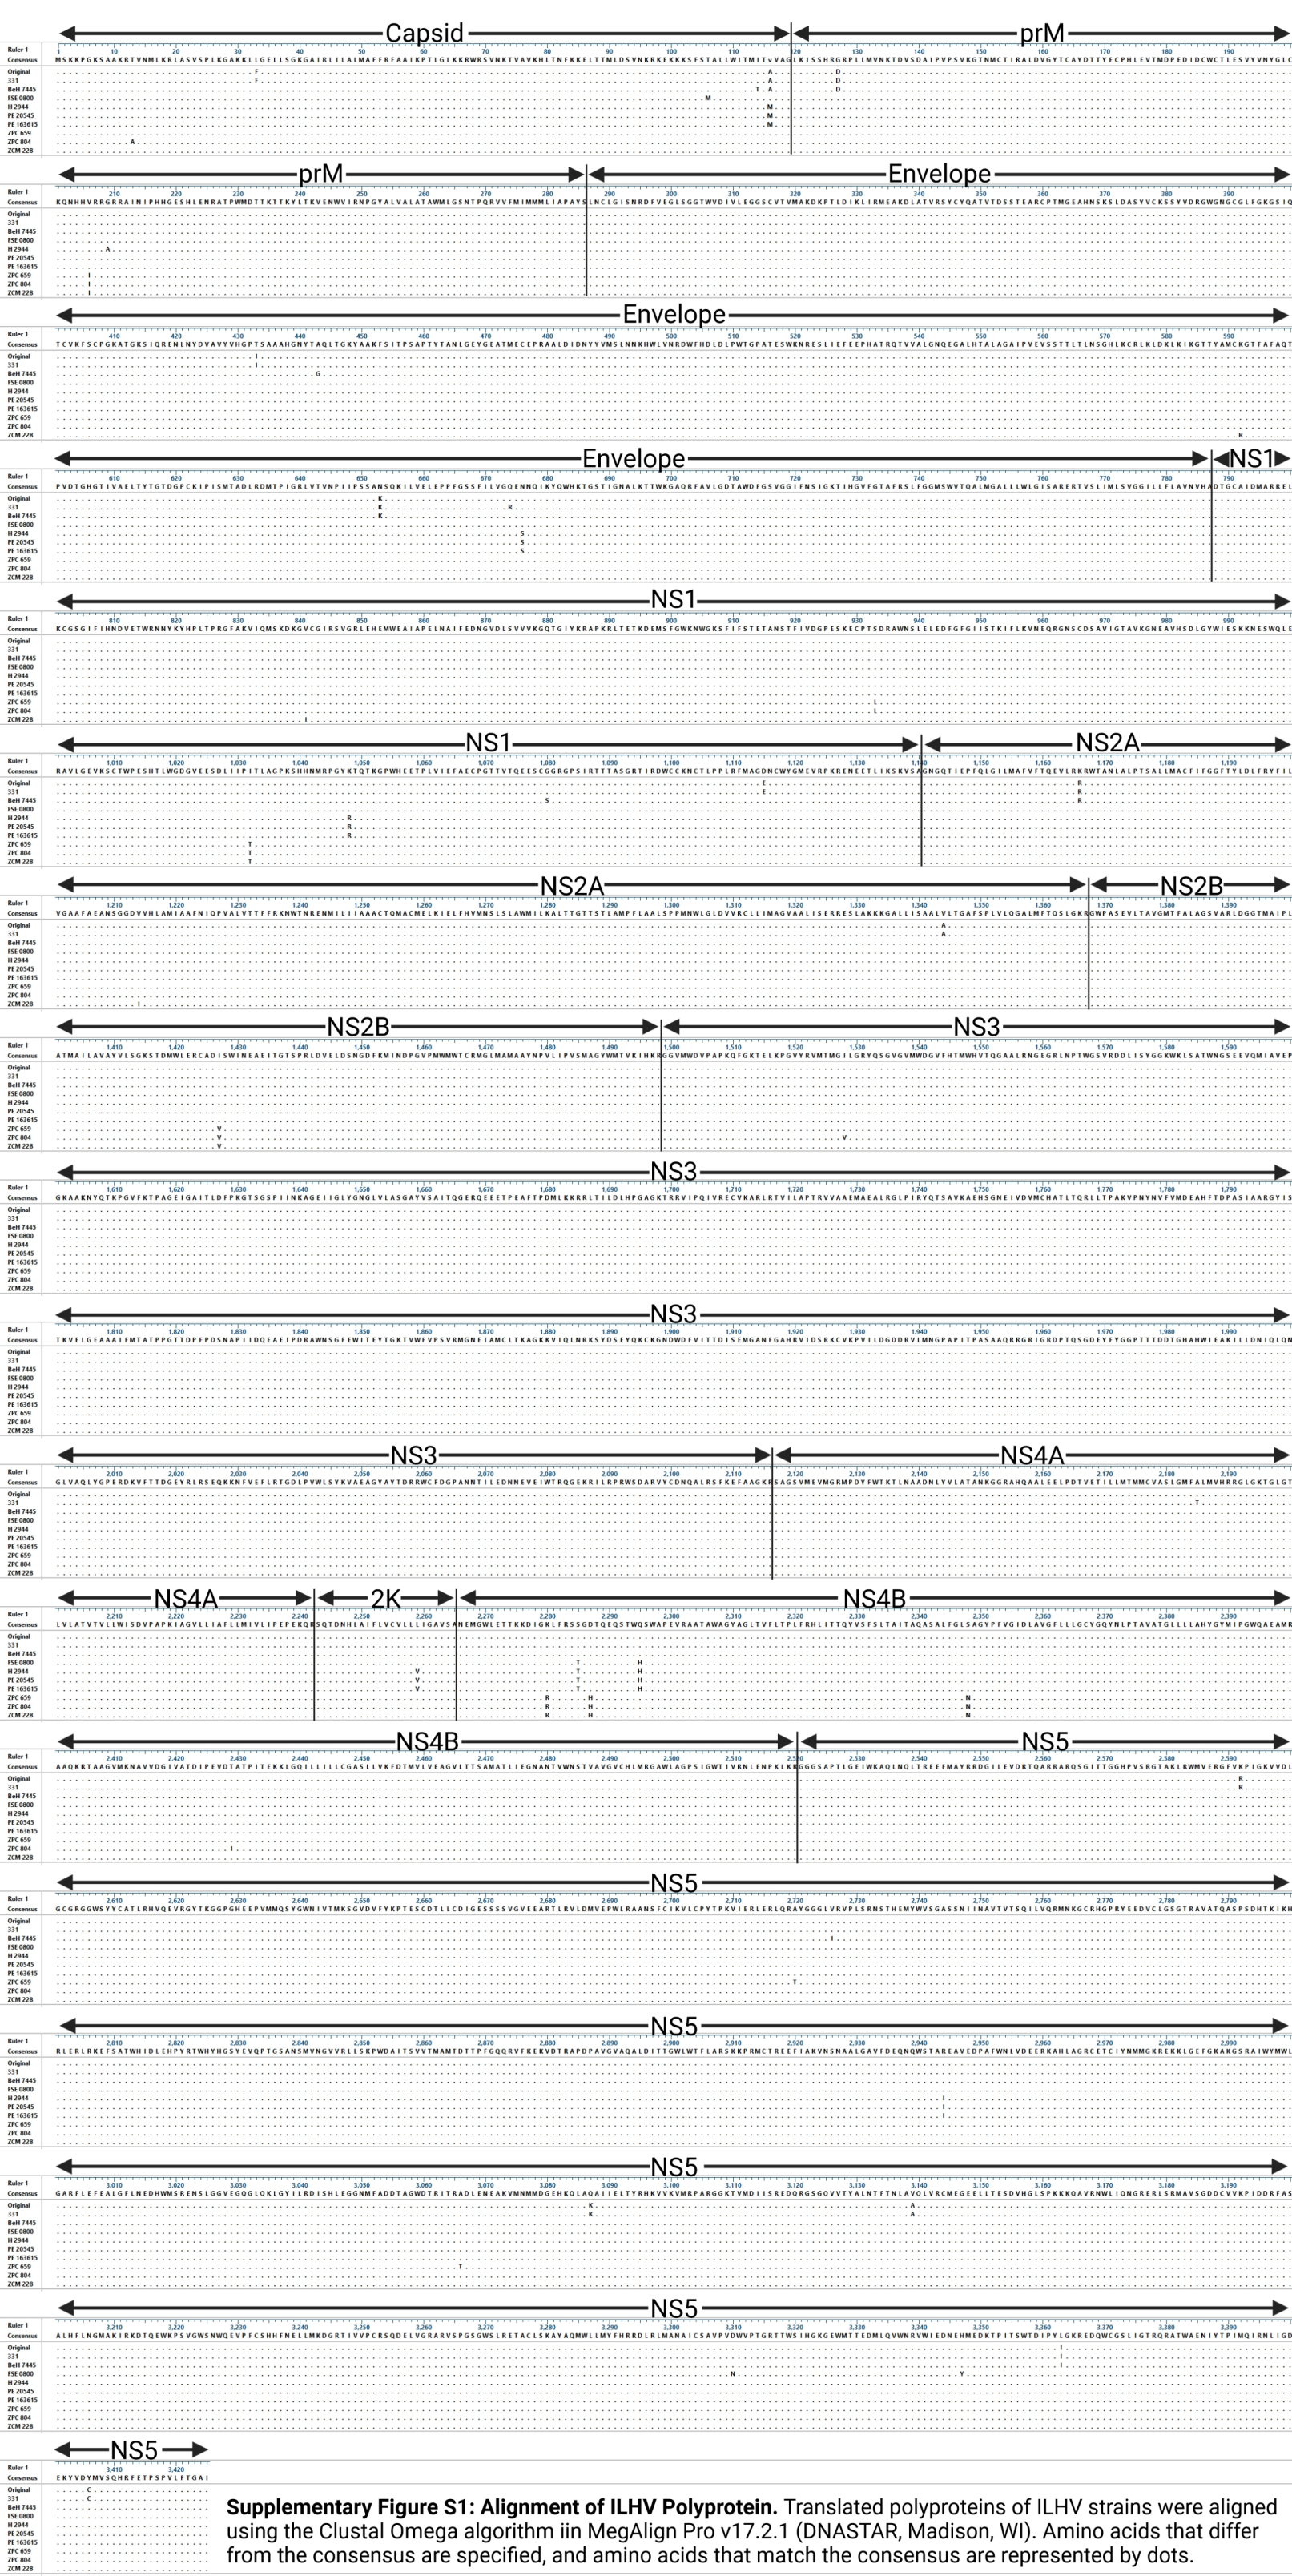

Supplement: s1 [file s1]
